1 **Comparative metagenomic analysis following treatment with vancomycin in C57BL/6 and BALB/c**  
2 **mice to elucidate host immunity and behavior**

3 Pratikshya Ray, Debasmita Das, Uday Pandey and Palok Aich\*

4

5 School of Biological Sciences, National Institute of Science Education and Research (NISER), HBNI, P.O. -  
6 Bhimpur-Padanpur, Jatni - 752050 Dist. - Khurdha, Odisha, India

7

8 \*Correspondence:

9 Dr. Palok Aich

10 [palok.aich@niser.ac.in](mailto:palok.aich@niser.ac.in)

11

12 **Keywords:** Gut Microbiota; Vancomycin; Gut permeability; Anxiety; Depression; Inflammation; Brain;  
13 BDNF

14

15 SRA accession: PRJNA566053

16

17 **Running title:** Metagenomic analysis of behavior and immunity

18

19

20

21

22

23

24 **Abstract:**

25 The gut is the largest reservoir of the resident microbiota. The microbiota can affect the host behavior and  
26 immunity. While the consequence of treatment with antibiotics on the gut microbiota can be destructive but  
27 can be utilized as a tool to understand the host immunity and behavior. The magnitude of perturbation and  
28 time needed for the restoration of gut microbiota can depend on the immune bias of the host. In the current  
29 study, we therefore, observed the perturbation and restoration kinetics of gut microbiota following treatment  
30 with vancomycin and its effect on the host physiology in both Th1-(C57BL/6) and Th2-(BALB/c) biased  
31 mice. A comparative metagenomic analysis revealed that the treatment with vancomycin caused a significant  
32 decrease in the abundance of Firmicutes and Bacteroidetes phyla and an initial increase in Proteobacteria.  
33 Increase in Proteobacteria decreased with continued treatment with vancomycin to result into a significant  
34 rise in Verrucomicrobia phylum. We established the patterns of gut microbiota alteration and its effect on a)  
35 the behavior of mice, b) expression of key brain molecules and b) immunity related genes. We followed the  
36 gut microbiome restoration for a period of two months following withdrawal of treatment with vancomycin.  
37 Maximum restoration (>70%) of gut microbiota happened by the 15<sup>th</sup> day of withdrawal. BALB/c mice  
38 showed a more efficient restoration of gut microbiota compared to C57BL/6 mice. The results, in general,  
39 revealed that along with the restoration of major gut microbes, important physiological and behavioral  
40 changes of both mice strains returned to the normal level.

41 **Introduction:**

42 Gastrointestinal tracts of human and other higher vertebrates harbor a large network of complex  
43 microorganisms, which is mostly host-specific and helps in maintaining proper homeostasis of the host (1–  
44 4). Any perturbation of gut microbes causes a disturbance in the homeostasis, which leads to various diseases  
45 (5, 6). Among various perturbing agents, antibiotics act as the most potent perturbing agent (7–9). The use of  
46 antibiotics not only destroys pathogens but also affects the diversity of beneficial commensal microbes  
47 present in the gut (9). Multiple studies reported the effects of different antibiotics on the composition and  
48 abundance of gut microbes (7, 10, 11). Reports suggested that overuse and abuse of antibiotics can lead to  
49 permanent changes in the composition of gut microbiota which lead to various metabolic disorders like  
50 obesity, diabetes-like diseases (8, 12, 13). Vancomycin is one of the potent antibiotics to perturb the gut  
51 microbiota (6). Vancomycin treatment caused a significant alteration in the composition and diversity of the  
52 commensal gut-microbiota of the host (14–16). The correlation, however, between the extent of gut  
53 microbiota perturbation with a specific dose and duration of vancomycin exposure is still poorly

54 characterized. Upon cessation of antibiotic treatment, the restoration kinetics of these microbes and its effect  
55 on the host behavior, immunity and other physiological functions are still not adequately addressed. While  
56 the immune bias (Th1 and Th2) of the host may play an important role on the gut microbial composition,  
57 how will the treatment with vancomycin or following withdrawal of the treatment be affecting the innate  
58 mucosal immunity or behavior and gut microbial composition (abundance and diversity) are open questions.  
59 Th1- and Th2-biased mice are two different inbred strains that differ in their baseline microbiota composition  
60 (17, 18). However, how differentially the gut microbiota, of two differently immune biased mice (Th1- and  
61 Th2-), respond to the same dose of vancomycin that needs to be explored. The differential perturbation and  
62 restoration kinetics of gut microbiomes may affect the behavior and immunity of mice in a different way  
63 between Th1- and Th2-biased mice. Moreover, the abundance and diversity of certain microbes can  
64 significantly regulate the behavior of mice.

65 Earlier studies reported that altered gut microbiota or the introduction of a pathogen to the gut causes  
66 various behavioral changes like anxiety and depression in mice (19–21). Levels of Brain-derived  
67 neurotrophic growth factor (BDNF), corticotropin-releasing hormone (CRH) and CRH binding protein  
68 (CRHBP) change with the stress created by the variation of gut microbiota of mice (22–24). Dysbiosis of gut  
69 microbiota modulates the expression of various tight junction proteins causing changes in the permeability of  
70 the gut (25). Various SCFA and metabolites produced by the gut microbiota mainly regulate the expression  
71 of these tight junction proteins (26).

72 In the current study, we tried to establish the difference in the alteration pattern of the gut microbiota of Th1-  
73 and Th2-biased mice during and post vancomycin treatment. We also correlated the effect of perturbation  
74 and restoration kinetics of gut microbes with the behavior, expression of brain specific gene markers and  
75 immune profile of two strains of mice. The current results revealed a strong association between the  
76 abundance of specific gut microbes (*A. muciniphila*, *E.coli*, F/B ratio) with the altered behavior pattern of  
77 mice. Both perturbation and restoration kinetics of gut microbiota followed different patterns in the two  
78 strains of mice. This difference was reflected in their behavior and in the expression of various stress and  
79 immune regulatory genes.

## 80 **Materials and methods**

81 **Animals Used in the study:** All mice used in the present study were housed in a polysulfone cage, and  
82 corncob was used as bedding material. Two mice strains C57BL/6 (Th1-) and BALB/c (Th2-) of 6-8 weeks  
83 were used for the present study. Food and water were provided *ad libitum*. Animals were co-housed in a

84 pathogen-free environment with a 12 h light-dark cycle (lights on from 7:00 am – 7:00 pm), temperature  $24 \pm$   
85  $3^{\circ}\text{C}$  and humidity 40-70% maintained. The guideline for animal usage was as per CPCSEA (Committee for  
86 the Purpose of Control and Supervision of Experiments on Animals, Govt. of India), and all protocols were  
87 approved by the Institute Animal Ethics Committee constituted by CPCSEA. A schema of the experimental  
88 protocol is shown in Fig. 1.

89 **Antibiotic treatment:** Both Th1-(C57BL/6) and Th2-(BALB/c) biased mice were treated with vancomycin  
90 (Cat#11465492) (at 50 mg per kg of body weight) for six consecutive days (Fig.1). 0.5 ml of vancomycin  
91 was orally gavaged twice daily at a gap of 12 h. The dosage was selected as per previous reports and FDA  
92 guidelines (27, 28).

93 **Restoration:** Following withdrawal of 6-days of treatment with vancomycin, mice were studied for 60 days.  
94 This period was termed as restoration phase. During the restoration phase, normal food and water were given  
95 *ad libitum* to mice. Mice were euthanized and various samples were collected at an interval of every 15 days  
96 of restoration, i.e., on the 15<sup>th</sup>, 30<sup>th</sup>, 45<sup>th</sup> and 60<sup>th</sup> day (Fig.1). For the behavioral studies, separate groups of  
97 mice were used and their behaviors were observed continuously during the period of perturbation and  
98 restoration.

99 **Sample collection:** Mice were split into two different groups: Control (untreated) and Treatment (groups  
100 that were treated with vancomycin). Mice belong to the treatment group was orally gavaged with  
101 vancomycin twice daily for 6 consecutive days. For each treated group, there was a corresponding time  
102 matched control group. Each group consisted of six mice. Mice belonged to the treated and time-matched  
103 control groups were euthanized everyday till day 6 (total of 6 time points) following treatment with  
104 vancomycin and four-time points of restoration (on 15<sup>th</sup>, 30<sup>th</sup>, 45<sup>th</sup>, and 60<sup>th</sup> day). Mice were euthanized by  
105 using cervical dislocation method as per protocol approved by the Institutional Animal Ethics Committee.  
106 Samples were collected from Colon, brain, blood, and cecal tissues of each mouse for further analysis using  
107 the methodologies described elsewhere (29).

108 **RNA extraction:** RNeasy mini kit (Cat# 74104, Qiagen India) was used to extract RNA from the cecal (gut)  
109 wall tissue. After sacrificing mice, the gut was washed properly and stored in RNA later for further use.  
110 During the extraction process, nearly 20-23 mg of gut tissue was churned using liquid nitrogen and 700  $\mu\text{l}$  of  
111 RLT buffer was added and homogenized well. An equal volume of 70% ethanol was added and mixed well.  
112 The solution was centrifuged at  $8000 \times g$  for 5 min at room temp. The clear solution containing lysate was  
113 passed through RNeasy mini column (Qiagen, Germany), which leads to the binding of RNA to the column.

114 The column was washed using 700  $\mu$ l RW1 buffer and next with 500  $\mu$ l of RPE buffer. RNA was eluted  
115 using 30  $\mu$ l of nuclease-free water. RNA was quantified and the quality was checked using NanoDrop 2000  
116 (Thermo Fisher Scientific, USA).

117 For RNA extraction from brain tissue, 100 mg of brain tissue was homogenized in 2 ml of TRIzol reagent.  
118 Centrifugation was done at 12000 $\times$ g at 4  $^{\circ}$ C for 10 min. The fat monolayer was carefully avoided while  
119 pipetting the rest of the sample in a clean 1.5 ml MCT and 400  $\mu$ L of chloroform was added to the sample.  
120 Centrifugation was again performed at 12000 $\times$  g for 30 min at 4 $^{\circ}$ C. RNA phase was transferred to a new  
121 MCT and 1.5 volume of 100% Ethanol was added. The sample was loaded to a spin column and HiPurA  
122 Total RNA Miniprep Purification Kit was used to extract RNA.

123 **cDNA preparation:** cDNA was synthesized by using the AffinityScript One-Step RT-PCR Kit (Cat#  
124 600559, Agilent, Santa Clara, US) using extracted RNA. RNA was mixed with a random 9mer primer, Taq  
125 polymerase, and NT buffer, the mixture was kept at 45 $^{\circ}$ C for 30 min for the synthesis of cDNA and  
126 temperature increased to 92 $^{\circ}$ C for deactivating the enzyme.

127 **Real-time PCR (qRT-PCR):** Real-time PCR performed in 96 well plates, using 25 ng of cDNA as template,  
128 1  $\mu$ M of each of forward (\_F) and reverse (\_R) primers for genes mentioned in Table 4, SYBR green master  
129 mix (Cat#A6002, Promega, Madison USA), and nuclease-free water. qRT-PCR was performed in  
130 QuantStudio 7 Real-Time PCR (Applied Biosystems, USA). All values were normalized with cycle threshold  
131 (Ct) value of GAPDH (internal control) and fold change of the desired gene was calculated with respect to  
132 control.

133 **Genomic DNA extraction:** Fresh cecal samples from euthanized mice were collected to obtain gDNA using  
134 phenol-chloroform extraction method. 150-200 mg of the cecal sample was taken and homogenized using 1  
135 ml of 1X PBS and centrifuged at 6700g for 10 minutes to get the pellet. The pellet was suspended in 1 ml of  
136 lysis buffer (Tris-HCl 0.1 M, EDTA 20 mM, NaCl 100 mM, 4% SDS) (pH 8) and lysed by homogenizing  
137 followed by heating at 80 $^{\circ}$ C for 45 min. Lipids and proteins were removed from the supernatant by using an  
138 equal volume of phenol-chloroform extraction. This process of removing lipids and proteins was repeated till  
139 the aqueous phase became colorless. gDNA was precipitated overnight at -20 $^{\circ}$ C with 3 volumes of absolute  
140 chilled ethanol. Finally, it was washed twice with 500  $\mu$ l of 70% chilled ethanol and air-dried. The gDNA  
141 was dissolved in nuclease-free water and quantified using NanoDrop 2000.

142 **Serum collection:** Mice were anaesthetized, and blood was collected by cardiac puncture. The blood sample  
143 was kept in ice for 30 mins and centrifuged at 1700×g for 15 min at 4°C, and serum was collected and stored  
144 at -80°C till further used.

145 **16S rRNA sequencing (V3-V4 Metagenomics):**

146 From cecal DNA samples, V3-V4 regions of 16S rRNA gene were amplified. For this amplification, V3F:  
147 5'-CCTACGGGNBGCASCAG-3' and V4R: 5'-GACTACNVGGGTATCTAATCC-3' primer pair was  
148 used. In Illumina Miseq platform, amplicons are sequenced using paired-end (250bp×2) with a sequencing  
149 depth of 500823.1 ± 117098 reads (mean ± SD). Base composition, quality and GC content of fastq sequence  
150 were checked. More than 90% of the sequences had a Phred quality score above 30 and GC content nearly  
151 40-60%. Conserved regions from the paired-end reads were removed. Using FLASH program, a consensus  
152 V3-V4 region sequence was constructed by removing unwanted sequences. Pre-processed reads from all the  
153 samples were pooled and clustered into Operational Taxonomic Units (OTUs) by using de novo clustering  
154 method based on their sequence similarity using UCLUST program. QIIME was used for the OTU  
155 generation and taxonomic mapping (30, 31). The representative sequence was identified for each OTU and  
156 aligned against the Greengenes core set of sequences using PyNAST program (32–35). Alignment of these  
157 representative sequences against reference chimeric data sets was done and RDP classifier against SILVA  
158 OTUs database was used for taxonomic classification.

159 **Calculation of Cecal index:** The body weight (in gram) of individual mouse was measured and recorded.  
160 The whole cecal content from each mouse was collected and weighed. The cecal index was measured by  
161 taking the ratio of cecal content to the body weight of the respective mouse (36).

162 **Gut permeability test by FITC dextran:** Vancomycin treated and restored mice at selected time points with  
163 the corresponding time-matched control mice were water-starved overnight. Next day FITC-dextran  
164 (Cat#F7250, Sigma-Aldrich, Missouri, US), at a concentration of 100 mg/ml, was dissolved in PBS and  
165 orally gavaged to water-starved mice. After 4 h, mice were anaesthetized by isoflurane inhalation and blood  
166 was collected by cardiac puncture. The concentration of FITC in the blood serum sample was measured by  
167 Spectrofluorometer with an excitation wavelength of 485 nm (20 nm bandwidth) and emission of 528 nm (20  
168 nm bandwidth). The procedure was performed by following the previously described protocol (37).

169 **Elevated plus maze test:** Elevated plus maze is commonly used for assessing anxiety levels in rodents -  
170 specifically in mice (38). It was constructed with wood, painted black and positioned 80 cm above the floor  
171 of the room. This instrument has a central platform and four crossed arms (50 cm long and 10 cm wide,  
172 each): two open and two closed arms with walls extending 30 cm above the maze floor. During the testing

173 session, each mouse (from both untreated and antibiotics-treated groups) was placed in the center of the maze  
174 facing one of the open arms, and every animal was permitted to explore the maze for 5 mins only. During  
175 these 5 mins, the total time spent in the closed and open arms was observed. This was recorded by using a  
176 computerized video tracking system (Smart 3.0, Panlab SMART video tracking system, Harvard Apparatus).  
177 For this test total, seven mice were used (n=7).

178 **Forced swim test (FST):** Forced swimming test is one of the valid ways of testing despair and depression  
179 created by stress in mice model (39). A cylindrical tank (30 cm height and 20 cm diameter) was made and it  
180 was filled up to 19 cm with tap water at  $24\pm 1^{\circ}\text{C}$  temperature. Each mouse was subjected to a 6 min of  
181 swimming session with the last five minutes considered for the data analysis. During this period, immobility  
182 was recorded by using a video camera. The mouse was considered to be immobile when it became static in  
183 the water without trying to escape. Those motions which were vital to hold its head above the water surface  
184 were not taken as immobile posture. For this test total, seven mice were used (n=7).

185 **Open field (OF) test:** Open field test is commonly used to measure anxiety and locomotor activities in  
186 small rodents (40). The instrument was made up of wood painted in black. It is a square box illuminated by a  
187 bright light from the ceiling. Each animal was placed in the middle of the box for five mins. Its locomotor  
188 activity was measured by using a computerized video tracking system (Smart 3.0, Panlab SMART video  
189 tracking system, Harvard Apparatus). The total time spent in the periphery and center of the instrument was  
190 measured. The open field was divided by virtual lines into 16 equal squares, 12 of which constituted the  
191 peripheral zone, and the remaining 4, the central zone of the box. For this test total, seven mice were used  
192 (n=7).

### 193 **Statistical Analysis:**

194 All the graphs were plotted using GraphPad Prism version 7.0. Both 't'-test (to compare any 2 data sets) and  
195 ANOVA (to compare more than two datasets) were performed for statistical analysis of data as described in  
196 the text.

197

### 198 **Results:**

#### 199 **Gut microbial composition of BALB/c and C57BL/6 following treatment with vancomycin.**

200 Earlier reports showed that the treatment with vancomycin could cause significant alteration of gut  
201 microbiome (15, 16). The detailed understanding of vancomycin treatment and the consequence of altered  
202 gut microbiome is yet to be established. A comparative study of time-dependent alteration pattern in the gut



203 microbiome in two strains of mice during and post vancomycin treatment was addressed by the current  
204 group. We compared differential patterns of gut microbiota profile during perturbation and restoration period  
205 following treatment with vancomycin in BALB/c and C57BL/6 mice. Metagenomic analysis (16S rRNA) of  
206 cecal content showed a significant a) decrease in the abundance of major phyla like Firmicutes (Fig.2A and  
207 Fig.2E) and Bacteroidetes (Fig.2B and Fig.2F), and b) increase in the abundance of Proteobacteria (Fig.2C  
208 and Fig.2G) up to the fourth day of vancomycin treatment in both BALB/c and C57BL/6 mice. On day four,  
209 following treatment with vancomycin, the abundance of Proteobacteria phylum was the highest (nearly 80%  
210 in both BALB/c and C57BL/6 mice). At a later stage of vancomycin treatment (after day four), the  
211 abundance of Verrucomicrobia phylum increased significantly in C57BL/6 mice compared to BALB/c mice  
212 (41). On the sixth day following vancomycin treatment, Verrucomicrobia abundance was nearly 30% in  
213 BALB/c mice and 72% in C57BL/6 mice (Figs. 2D and 2H).

214 We stopped vancomycin treatment after the sixth day and left the mice to recover (termed as restoration  
215 phase). We observed the restoration of gut microbiota on the 15<sup>th</sup>, 30<sup>th</sup> and 60<sup>th</sup> day following the withdrawal  
216 of the treatment with vancomycin. The metagenomic data of cecal content during the restoration phase  
217 showed an increase in Firmicutes and Bacteroidetes phyla and a decrease in Proteobacteria and  
218 Verrucomicrobia phyla in both BALB/c and C57BL/6 mice (Figs.2 and 3). Overall, BALB/c mice showed  
219 higher efficiency in restoring the gut microbiota. The results revealed that the composition of BALB/c mice  
220 became similar to its respective control mice faster than C57BL/6 mice (Fig.3). A few selected time points  
221 were chosen to show major transitions in the gut microbial abundance and diversity during the perturbation  
222 and restoration period (Fig.3). On the 15<sup>th</sup> day of restoration, in C57BL/6 mice, nearly 16% higher  
223 Proteobacteria and 18% lower Bacteroidetes phyla (Fig.3I) were observed compared to its respective time  
224 matched control group of mice (Fig. 3F). While, in BALB/c mice, only 8% higher Proteobacteria and no  
225 significant difference in Bacteroidetes phyla (Fig.3D) were found compared to its untreated control mice  
226 (Fig. 3A).

227 On the 60<sup>th</sup> day of restoration, in BALB/c mice, maximum gut microbiota from all the major phyla was  
228 restored and looked almost similar to the microbiota of untreated control mice (Fig. 3). In C57BL/6 mice,  
229 Bacteroidetes and Proteobacteria phyla were not fully restored. Bacteroidetes phylum was nearly 10% lower  
230 and Proteobacteria phylum was nearly 4% higher compared to the respective untreated group of mice. The  
231 difference, in the gut microbiota level between the two strains of mice on the 60<sup>th</sup> day of restoration, was



232 significant. The restoration was more effective in BALB/c (Figs. 3A and 3E) than C57BL/6 mice (Figs. 3F  
233 and 3J) (Table 1).

234 In addition, the diversity of gut microbiota decreased during vancomycin treatment for both strains of mice.  
235 Shannon diversity index (H) at the phylum level was found to be the lowest on day four following  
236 vancomycin treatment in both BALB/c and C57BL/6 mice. During the restoration period, H value increased  
237 and became similar to that of the untreated mice (Table 2).

### 238 **Altered gut microbiota increased anxiety and depressive-like behavior in mice.**

239 Gut microbiota has major effects on the behavior of mice (42). Elevated plus maze (EPM), Open field (OF)  
240 and Forced swimming test (FST) techniques were widely used to study behavioral changes like anxiety and  
241 depression in mice (43–46). EPM test, during vancomycin treatment, showed that both BALB/c and  
242 C57BL/6 mice stayed longer in the closed than open arms (Figs. 4IA and 4IB) compared to its respective  
243 untreated group of mice. The still image of video captured trajectory, or the paths traversed by the mice in  
244 EPM was shown in Fig.4II. The behavior in EPM showed a higher level of anxiety in mice and it increased  
245 continuously from day zero to day six following treatment with vancomycin in BALB/C mice. In C57BL/6  
246 mice, anxiety level increased from day zero to day four following vancomycin treatment but after day four,  
247 the anxiety level decreased. On day six, following vancomycin treatment, C57BL/6 mice spent less time in  
248 the closed arm compared to its day four. During the restoration period, anxiety level decreased and came to  
249 normal in both BALB/c and C57BL/6 mice. Mice spent less time in closed arms during the restoration period  
250 than the perturbation period. On the 15<sup>th</sup> day of restoration following cessation of vancomycin treatment,  
251 BALB/c mice showed less anxiety than C57BL/6 mice. On the 60<sup>th</sup> day of restoration, all the vancomycin  
252 treated groups of mice behaved nearly similar to their respective untreated group of mice (Figs. 4IA, and  
253 4IB).

254 Open field (OF) test showed similar results like elevated plus-maze for vancomycin treated mice. A higher  
255 level of anxiety was found in vancomycin treated mice than control mice. The results from the OF test  
256 showed that during vancomycin treatment, mice spent less time in the center than control mice (Figs. 4IC and  
257 4ID). The still image of video captured trajectory, or the paths traversed by the mice in OFT is shown in  
258 Fig.4III. Up to the day four following vancomycin treatment, both BALB/c and C57BL/6 mice showed an  
259 increase in anxiety-like behavior (less time spent in the center). However, from day four to six following  
260 vancomycin treatment, C57BL/6 mice showed significantly less anxiety-like behavior (more time spent in  
261 the center) compared to BALB/c mice.

262 During the restoration period, vancomycin treated both BALB/c and C57BL/6 mice started to spend more  
263 time in the center compared to their perturbation period, which showed a decrease in the anxiety level. While  
264 for BALB/c mice there was no significant difference in the center time was found, C57BL/6 mice showed a  
265 significant difference between 15th day restoration and time matched control. On the 60<sup>th</sup> day of restoration  
266 both vancomycin treated BALB/c and C57BL/6 mice behave nearly similar to their respective control group  
267 of mice (Figs. 4IC and 4ID).

268 In Forced swimming test (FST), it was found that the vancomycin treated group of mice became immobile  
269 most of the time in the water without trying to escape, which showed a higher level of depression in these  
270 mice compared to the control mice (Figs. 4IE and 4IF). This depressive behavior was highest on the day four  
271 following vancomycin treatment in both BALB/c and C57BL/6 strains. While on the day six following  
272 vancomycin treatment, a significantly less depressive behavior was found in C57BL/6 mice than BALB/c  
273 mice. On the 15<sup>th</sup> day of restoration, vancomycin treated BALB/c and C57BL/6 mice behaved nearly similar  
274 to control mice that showed a significant decrease in their depression level within 15 days of restoration.

275 In summary, gut microbiota perturbation following vancomycin treatment led to significant behavioral  
276 changes as examined by the open field, elevated plus maze and forced swim tests. The recovery in the  
277 behavioral changes is associated with the time-dependent restoration of gut microbiota profile.

### 278 **Antibiotic treatment changed BDNF and CRH levels in the mouse brain**

279 Change in behavior is an indication of changes in brain function. As described before, there are a few  
280 signature molecules, brain-derived neurotrophic factor (BDNF) and corticotropin-releasing hormone (CRH),  
281 whose expression levels speak volumes (47, 48). BDNF is necessary for the maintenance of neuronal circuit  
282 formation and its level of expression in the brain is associated with depression and anxiety of the host (47).  
283 Gut microbiota has a significant role in regulating BDNF expression (46, 49). We studied mRNA level  
284 expression of BDNF from the hippocampus of both antibiotic perturbed and restored mice. It was found that  
285 the BDNF level was decreased in both vancomycin treated BALB/c and C57BL/6 mice (Figs. 5A and 5B).  
286 Up to day four following vancomycin treatment, both BALB/c and C57BL/6 mice showed a decrease in  
287 BDNF expression. On the day six following vancomycin treatment, this reduction in the expression of BDNF  
288 was lower in C57BL/6 mice compared to BALB/c mice. During the restoration process, within the 15 days of  
289 withdrawal of vancomycin, the BDNF level came to nearly normal level in the brain of vancomycin treated  
290 mice.

291 Like BDNF, gut microbiota also modulates CRH in the hypothalamus of the brain and regulates stress  
292 response in the host (50). We tested the mRNA level expression of CRH and CRHBP in the vancomycin  
293 treated mice brain hypothalamus and found a higher level of CRH and lower level of CRHBP compared to  
294 control mice (Figs. 5A and 5B). During the restoration process, both CRH and CRHBP came to the nearly  
295 normal level within 15 days of cessation of vancomycin. On the 15<sup>th</sup> day of restoration, BALB/c mice  
296 showed higher similarity in the expression of BDNF, CRH, and CRHBP with their control groups, while  
297 C57BL/6 mice showed less similarity with their control group.

### 298 **The inflammatory response changed in the gut and brain with antibiotic treatment.**

299 Gut microbiota regulates the immune response and inflammatory state of the brain and its perturbation can  
300 cause cytokine-induced depression in the host (42, 51). In the current study, we checked the expression of  
301 select cytokines like *tnf $\alpha$* , *ill1a* and *il10* genes at mRNA level in mice brain by qRT PCR. During vancomycin  
302 treatment, it was found that the levels of both *tnf $\alpha$*  and *ill1a* increased significantly in the brain of BALB/c  
303 and C57BL/6 mice (Figs. 5C and 5D). Their expression was highest on the day four following vancomycin  
304 treatment. No significant changes were found in the expression of *il10* in the brain of mice during  
305 vancomycin treatment (data not shown to avoid clutter).

306 Tight junction protein expression in the brain maintains the integrity of the blood-brain barrier (BBB). BBB  
307 of germ-free mice is more permeable than their SPF counterparts (26), which showed the significance of gut  
308 microbiota in maintaining healthy BBB. In this study, we checked the expression of *claudin5* at the mRNA  
309 level in the brain of both BALB/c and C57BL/6 mice following antibiotic treatment. A significant reduction  
310 was observed in the expression of *claudin5* gene at the mRNA level in the vancomycin treated mice brain  
311 compared to its time-matched untreated group of mice during the perturbation period (Figs. 5C and 5D). On  
312 the 15<sup>th</sup> day of restoration, we observed an increase in *claudin5* expression in the brain and became similar to  
313 the control group of mice.

314 We also studied the changes in the cytokines at the mRNA level in the gut during perturbation and  
315 restoration of gut microbes. We found a significant increase in pro-inflammatory cytokines gene expressions  
316 like *tnf $\alpha$*  and *ill1a* (Figs. 6A and 6B) and a decrease in anti-inflammatory cytokine-like *il10* (Fig. 6C) in the  
317 gut following vancomycin perturbation. On the day four following vancomycin treatment, expression levels  
318 of *tnf $\alpha$*  and *ill1a* were the highest, and expression of *il10* was the lowest in both BALB/c and C57BL/6 mice  
319 with respect to its time matched control value. Within 15 days of restoration, expression of all the cytokines  
320 in the gut became similar to their respective control mice in both BALB/c and C57BL/6 mice.

321 **Antibiotic treatment increased gut permeability by modulating the expression of tight junction**  
322 **protein.**

323 The tight junction proteins like Occludin and Claudin regulate the integrity of the gut (52). Alteration of gut  
324 microbiota could compromise the expression of tight junction proteins and might lead to inflammation (53).  
325 In the current study, we found a lower expression of occludin (Fig. 6D) and claudin1 (Fig. 6E) at mRNA  
326 level in colon tissue during vancomycin treatment in both BALB/C and C57BL/6 mice, which might be a  
327 reason for the increased permeability of the gut. During the restoration process, their expression increased  
328 and became similar to the control mice within 15 days of the restoration period. For further confirmation of  
329 gut permeability, FITC conjugated dextran was gavaged to the day 4 mice following vancomycin treatment  
330 and day 60 mice of restoration group following cessation of antibiotic treatment. FITC dextran concentration  
331 was found to be significantly higher on the 4<sup>th</sup> day following vancomycin treatment in both Th1- and Th2-  
332 biased mice ( $367\pm 25$  ng/ml in BALB/c and  $350\pm 23$  ng/ml in C57BL/6) (Fig. 6F). During the restoration  
333 period, FITC concentration in the serum came to the normal level.

334 Gut microbiota abundance and composition regulate the cecal size of mice. The cecum is known to be a  
335 better representation than the fecal sample for understanding intestinal microbiota profile and cecum size  
336 changes during dysbiosis of gut microbiota (54, 55). A Large cecum was observed in vancomycin treated  
337 mice than the untreated group of mice (Fig. 6G). The cecal index was calculated and found to be increased  
338 continuously during the perturbation period in both BALB/c and C57BL/6 mice (Fig. 6H). During the  
339 restoration process, the cecum size decreased and came to the normal level within fifteen days following  
340 cessation of vancomycin treatment.

341 **Discussion**

342 Vancomycin perturbation caused a significant alteration in all major phyla of gut microbes (14–16). In the  
343 current study, we found that the perturbation of gut microbiota caused by vancomycin and its successive  
344 restoration kinetics follow a pattern. We observed specific patterns of changes in the major phyla of gut  
345 microbes during vancomycin perturbation and restoration. These specific alteration patterns of gut microbes  
346 affected the behavior and physiology of the host significantly. We found an important correlation between  
347 certain increased (Proteobacteria, Verrucomicrobia) and decreased (Firmicutes, Bacteroidetes) gut microbes  
348 with the anxiety and depressive behavior of mice. The patterns of changes, for perturbation and restoration  
349 kinetics of gut microbiome, observed between BALB/c and C57BL/6 at the same dose of vancomycin are  
350 different. Up to day four following vancomycin treatment, we found similar extent of increase in

351 Proteobacteria and a decrease in Firmicutes and Bacteroidetes phyla in the gut of both BALB/c and C57BL/6  
352 mice. These similar changes in the major phyla of gut microbes had nearly the same type of impact on the  
353 physiology of both types of immune biased mice. However, after day four, a significant biased increase of  
354 Verrucomicrobia phylum in C57BL/6 mice caused differential behavioral and immunological changes  
355 between two strains of mice. We confirmed the presence of *Akkermansia muciniphila* of Verrucomicrobia  
356 phylum on the day six following vancomycin treatment in C57BL/6 mice (41).

357 Earlier studies established that the restoration of gut microbiota was not complete following perturbation  
358 with antibiotics. All the species of gut microbiota present before the antibiotic treatment were not recovered  
359 during the restoration period (9, 56). The current study showed that restoration of most of the gut microbiota  
360 (>70%) happened within 15 days following cessation of vancomycin treatment. On the sixty day of  
361 restoration maximum part of gut microbes became restored but their abundance and composition were not  
362 exactly similar to the untreated mice (Fig.3). Similar to the perturbation kinetics, restoration kinetics of gut  
363 microbes also varied between BALB/c and C57BL/6 mice. In BALB/c mice, restoration efficiency of certain  
364 major phyla (Proteobacteria, Firmicutes) of gut microbes was higher than C57BL/6 mice. Major changes in  
365 the gut microbiota happened on the 4<sup>th</sup> and 6<sup>th</sup> day of perturbation and 15<sup>th</sup> day of restoration. We, therefore,  
366 mainly focused on the changes happening in the host physiology and behavior of mice on above time points.

367 It was reported that alteration in the composition and diversity of gut microbes caused changes in the  
368 behavior of mice in EPM, FST and OF test (26). It was also reported that colonization of germ free (GF)  
369 mice with *Bifidobacterium infantis* normalized the stress level in mice. Mono-colonization with *Escherichia*  
370 *coli*, however, induced even higher stress level in GF mice (43, 57). Earlier reports further suggested that  
371 different bacteria of Firmicutes phylum helped in reducing anxiety and depression like behavior in mice (58).  
372 *Akkermansia muciniphila* bacteria caused a reduction in anxiety behavior in mice (59). Reports showed that  
373 increased Firmicutes to Bacteroidetes ratio (F/B ratio) in the gut caused hypertension and anxiety-like  
374 behavior of the host (60, 61). In the current study, we observed a high-level of correlation between relative  
375 patterns of changes in gut microbiota and behavior of mice. During vancomycin treatment, up to day four,  
376 increase in pathogenic bacteria like *Escherichia coli* and decrease in beneficial bacteria caused higher anxiety  
377 and depressive behavior in both Th1- and Th2- biased mice in EPM, OF and FST tests. After day four,  
378 Verrucomicrobia phylum replaced the Proteobacteria phylum in C57BL/6 mice which caused lower anxiety  
379 and depressive behavior in C5BL/6 mice compared to BALB/c mice. On the day four following vancomycin  
380 treatment, the dominance of single phylum (Proteobacteria) caused a decrease in diversity of gut microbes

381 and on the day six, the appearance of Verrucomicrobia and other microbes caused the increase in diversity of  
382 gut microbes. This alteration in the diversity of gut microbes was reflected in the behavior of mice. The F/B  
383 ratio increased during vancomycin treatment and decreased during the restoration period (Table 3). This  
384 increase in F/B ratio might be associated with higher anxiety behavior of mice during vancomycin treatment.  
385 During the restoration period (on the 15<sup>th</sup> day), with the more efficient restoration of gut microbiota in  
386 BALB/c mice caused less anxiety and depressive behavior compared to C57BL/6 mice.

387 BDNF has a significant relationship with the stress level of the host. An earlier report showed that BDNF  
388 level decreases and CRH level increases in anxiety patients than normal individuals (47). Dysbiosis of gut  
389 microbiota caused changes in BDNF and CRH levels in the host (48, 62). In the current study, we found less  
390 BDNF and higher CRH in the brain of vancomycin treated mice, which was justified by the higher anxiety  
391 and depressive behavior of vancomycin-treated mice compared to control mice in EPM, FST and OF test.  
392 Increased pathogenic Proteobacteria and decreased beneficial microbes during vancomycin treatment caused  
393 stress in mice which modulated BDNF, CRH and CRHBP levels in the brain. The expression pattern of these  
394 stress related genes are proposed to be due to the alteration pattern of gut microbes hence the behavior of  
395 mice. Increased Proteobacteria level on the fourth day and Verrucomicrobia level on the sixth day following  
396 vancomycin treatment showed two opposite effects on the expression of stress related genes. On the 15<sup>th</sup> day  
397 of restoration, BALB/c mice showed more similar expression of stress genes with its respective control  
398 groups compared to C57BL/6 mice. The results and the correlation between changes in the stress associated  
399 genes and specific gut microbiota perhaps indicated a plausible causal relation and regulation for both strains  
400 of mice.

401 Proteobacteria phylum contains mostly gram-negative pathogenic bacteria to contribute LPS to bind to the  
402 TLR receptor of the gut and activates the expression of pro-inflammatory cytokines (63). Firmicutes,  
403 specifically Clostridium group present in the gut produces short-chain fatty acid (64) and these SCFA in the  
404 gut suppresses the LPS and pro-inflammatory cytokines and enhances the secretion of the anti-inflammatory  
405 cytokines (65, 66). In the current study, increased Proteobacteria and decreased Firmicutes enhanced the  
406 inflammation and permeability of gut and brain in mice, while increased Verrucomicrobia alleviated these  
407 effects during vancomycin treatment. All the major changes that happened in the host during the perturbation  
408 period became normal with the successful restoration of gut microbes.

409 In summary, gut microbiota perturbation and restoration followed some specific patterns following  
410 vancomycin treatment. Alteration in the abundance of a few specific groups of gut microbes mostly regulated



411 the behavior and immune system of mice. The alteration patterns (both during perturbation and restoration  
412 period) of gut microbes were time dependent and significantly varied between BALB/c and C57BL/6 mice.

### 413 **Acknowledgement**

414 This research received no specific grant from any funding agency in the public, commercial, or not-for-profit  
415 sectors.

### 416 **Conflict of Interest**

417 The authors declare that there is no conflict of interest.

### 418 **Funding & payment:**

419 The current work (necessary resources to perform the experiment and the infra-structure for the laboratory)  
420 was supported by the parent institute National Institute of Science Education and Research. The current work  
421 was not supported through any extra-mural funding except the Ph.D. fellowship to PR by the Council of  
422 Scientific and Industrial Research (CSIR), Govt. of India, India. The current authors have no support to pay  
423 for the open-access or article processing fees to publish this research article.

### 424 **References:**

- 425 1. Guinane CM, Cotter PD. 2013. Role of the gut microbiota in health and chronic gastrointestinal  
426 disease: understanding a hidden metabolic organ. *Therap Adv Gastroenterol* 6:295–308.
- 427 2. Contijoch EJ, Britton GJ, Yang C, Mogno I, Li Z, Ng R, Llewellyn SR, Hira S, Johnson C,  
428 Rabinowitz KM. 2018. Gut microbiota density influences host physiology and is shaped by host and  
429 microbial factors. *Elife* 8:277095.
- 430 3. Ubeda C, Djukovic A, Isaac S. 2017. Roles of the intestinal microbiota in pathogen protection. *Clin*  
431 *Transl Immunol* 6.
- 432 4. Mandal RS, Saha S, Das S. 2015. Metagenomic surveys of gut microbiota. *Genomics Proteomics*  
433 *Bioinformatics* 13:148–158.
- 434 5. Missaghi B, Barkema HW, Madsen KL, Ghosh S. 2014. Perturbation of the human microbiome as a  
435 contributor to inflammatory bowel disease. *Pathogens* 3:510–527.
- 436 6. Carding S, Verbeke K, Vipond DT, Corfe BM, Owen LJ. 2015. Dysbiosis of the gut microbiota in



- 437 disease. *Microb Ecol Health Dis* 26:26191.
- 438 7. Francino MP. 2016. Antibiotics and the human gut microbiome: dysbioses and accumulation of  
439 resistances. *Front Microbiol* 6:1543.
- 440 8. Fujisaka S, Ussar S, Clish C, Devkota S, Dreyfuss JM, Sakaguchi M, Soto M, Konishi M, Softic S,  
441 Altindis E. 2016. Antibiotic effects on gut microbiota and metabolism are host dependent. *J Clin*  
442 *Invest* 126:4430–4443.
- 443 9. Jernberg C, Löfmark S, Edlund C, Jansson JK. 2010. Long-term impacts of antibiotic exposure on the  
444 human intestinal microbiota. *Microbiology* 156:3216–3223.
- 445 10. Dethlefsen L, Huse S, Sogin ML, Relman DA. 2008. The pervasive effects of an antibiotic on the  
446 human gut microbiota, as revealed by deep 16S rRNA sequencing. *PLoS Biol* 6:e280.
- 447 11. Looft T, Allen HK. 2012. Collateral effects of antibiotics on mammalian gut microbiomes. *Gut*  
448 *Microbes* 3:463–467.
- 449 12. Dunlop SP, Hebden J, Campbell E, Naesdal J, Olbe L, Perkins AC, Spiller RC. 2006. Abnormal  
450 intestinal permeability in subgroups of diarrhea-predominant irritable bowel syndromes. *Am J*  
451 *Gastroenterol* 101:1288.
- 452 13. Bosi E, Molteni L, Radaelli MG, Folini L, Fermo I, Bazzigaluppi E, Piemonti L, Pastore MR, Paroni  
453 R. 2006. Increased intestinal permeability precedes clinical onset of type 1 diabetes. *Diabetologia*  
454 49:2824–2827.
- 455 14. Isaac S, Scher JU, Djukovic A, Jiménez N, Littman DR, Abramson SB, Pamer EG, Ubeda C. 2016.  
456 Short-and long-term effects of oral vancomycin on the human intestinal microbiota. *J Antimicrob*  
457 *Chemother* 72:128–136.
- 458 15. Vrieze A, Out C, Fuentes S, Jonker L, Reuling I, Kootte RS, Van Nood E, Holleman F, Knaapen M,  
459 Romijn JA, Soeters MR, Blaak EE, Dallinga-Thie GM, Reijnders D, Ackermans MT, Serlie MJ, Knop  
460 FK, Holst JJ, Van Der Ley C, Kema IP, Zoetendal EG, De Vos WM, Hoekstra JBL, Stroes ES, Groen  
461 AK, Nieuwdorp M. 2014. Impact of oral vancomycin on gut microbiota, bile acid metabolism, and  
462 insulin sensitivity. *J Hepatol* 60:824–831.
- 463 16. Sun L, Zhang X, Zhang Y, Zheng K, Xiang Q, Chen N, Chen Z, Zhang N, Zhu J, He Q. 2019.

- 464 Antibiotic-Induced Disruption of Gut Microbiota Alters Local Metabolomes and Immune Responses.  
465 *Front Cell Infect Microbiol* 9:99.
- 466 17. Fransen F, Zagato E, Mazzini E, Fosso B, Manzari C, El Aidy S, Chiavelli A, D'Erchia AM, Sethi  
467 MK, Pabst O. 2015. BALB/c and C57BL/6 mice differ in polyreactive IgA abundance, which impacts  
468 the generation of antigen-specific IgA and microbiota diversity. *Immunity* 43:527–540.
- 469 18. Watanabe H, Numata K, Ito T, Takagi K, Matsukawa A. 2004. Innate immune response in Th1- and  
470 Th2-dominant mouse strains. *Shock*.
- 471 19. Foster JA, Rinaman L, Cryan JF. 2017. Stress & the gut-brain axis: regulation by the microbiome.  
472 *Neurobiol Stress* 7:124–136.
- 473 20. Goehler LE, Park SM, Opitz N, Lyte M, Gaykema RPA. 2008. *Campylobacter jejuni* infection  
474 increases anxiety-like behavior in the holeboard: possible anatomical substrates for viscerosensory  
475 modulation of exploratory behavior. *Brain Behav Immun* 22:354–366.
- 476 21. Lyte M, Li W, Opitz N, Gaykema RPA, Goehler LE. 2006. Induction of anxiety-like behavior in mice  
477 during the initial stages of infection with the agent of murine colonic hyperplasia *Citrobacter*  
478 *rodentium*. *Physiol Behav* 89:350–357.
- 479 22. Bercik P, Denou E, Collins J, Jackson W, Lu J, Jury J, Deng Y, Blennerhassett P, Macri J, McCoy  
480 KD. 2011. The intestinal microbiota affect central levels of brain-derived neurotropic factor and  
481 behavior in mice. *Gastroenterology* 141:599–609.
- 482 23. Park AJ, Collins J, Blennerhassett PA, Ghia JE, Verdu EF, Bercik P, Collins SM. 2013. Altered  
483 colonic function and microbiota profile in a mouse model of chronic depression. *Neurogastroenterol*  
484 *Motil* 25:733--e575.
- 485 24. Li K, Nakajima M, Ibañez-Tallon I, Heintz N. 2016. A cortical circuit for sexually dimorphic  
486 oxytocin-dependent anxiety behaviors. *Cell* 167:60–72.
- 487 25. Fasano A, Shea-Donohue T. 2005. Mechanisms of disease: the role of intestinal barrier function in the  
488 pathogenesis of gastrointestinal autoimmune diseases. *Nat Rev Gastroenterol Hepatol* 2:416.
- 489 26. Luczynski P, McVey Neufeld K-A, Oriach CS, Clarke G, Dinan TG, Cryan JF. 2016. Growing up in a  
490 bubble: using germ-free animals to assess the influence of the gut microbiota on brain and behavior.

- 491 Int J Neuropsychopharmacol 19.
- 492 27. Erikstrup LT, Aarup M, Hagemann-Madsen R, Dagnaes-Hansen F, Kristensen B, Olsen KEP,  
493 Fuursted K. 2015. Treatment of *Clostridium difficile* infection in mice with vancomycin alone is as  
494 effective as treatment with vancomycin and metronidazole in combination. *BMJ open Gastroenterol*  
495 2:e000038.
- 496 28. Patel S, Preuss C V, Bernice F. 2019. *VancomycinStatPearls*. StatPearls Publishing.
- 497 29. Fröhlich EE, Farzi A, Mayerhofer R, Reichmann F, Jačan A, Wagner B, Zinser E, Bordag N, Magnes  
498 C, Fröhlich E, Kashofer K, Gorkiewicz G, Holzer P. 2016. Cognitive impairment by antibiotic-  
499 induced gut dysbiosis: Analysis of gut microbiota-brain communication. *Brain Behav*  
500 *Immun*2016/02/23. 56:140–155.
- 501 30. Caporaso JG, Kuczynski J, Stombaugh J, Bittinger K, Bushman FD, Costello EK, Fierer N, Pena AG,  
502 Goodrich JK, Gordon JI. 2010. QIIME allows analysis of high-throughput community sequencing  
503 data. *Nat Methods* 7:335.
- 504 31. Kastenberger I, Lutsch C, Herzog H, Schwarzer C. 2012. Influence of sex and genetic background on  
505 anxiety-related and stress-induced behaviour of prodynorphin-deficient mice. *PLoS One* 7:e34251.
- 506 32. DeSantis TZ, Hugenholtz P, Larsen N, Rojas M, Brodie EL, Keller K, Huber T, Dalevi D, Hu P,  
507 Andersen GL. 2006. Greengenes, a chimera-checked 16S rRNA gene database and workbench  
508 compatible with ARB. *Appl Environ Microbiol* 72:5069–5072.
- 509 33. DeSantis TZ, Hugenholtz P, Keller K, Brodie EL, Larsen N, Piceno YM, Phan R, Andersen GL. 2006.  
510 NAST: A multiple sequence alignment server for comparative analysis of 16S rRNA genes. *Nucleic*  
511 *Acids Res* 34:394–399.
- 512 34. Frank DN, Amand ALS, Feldman RA, Boedeker EC, Harpaz N, Pace NR. 2007. Molecular-  
513 phylogenetic characterization of microbial community imbalances in human inflammatory bowel  
514 diseases. *Proc Natl Acad Sci* 104:13780–13785.
- 515 35. Zhou Y, Zhi F. 2016. Lower level of bacteroides in the gut microbiota is associated with inflammatory  
516 bowel disease: a meta-analysis. *Biomed Res Int* 2016.
- 517 36. Vazquez-Torres A, Vallance BA, Bergman MA, Finlay BB, Cookson BT, Jones-Carson J, Fang FC.

- 518 2004. Toll-like receptor 4 dependence of innate and adaptive immunity to Salmonella: importance of  
519 the Kupffer cell network. *J Immunol* 172:6202–6208.
- 520 37. Woting A, Blaut M. 2018. Small Intestinal Permeability and Gut-Transit Time Determined with Low  
521 and High Molecular Weight Fluorescein Isothiocyanate-Dextrans in C3H Mice. *Nutrients* 10:685.
- 522 38. Walf AA, Frye CA. 2007. The use of the elevated plus maze as an assay of anxiety-related behavior in  
523 rodents. *Nat Protoc* 2:322.
- 524 39. Desbonnet L, Garrett L, Clarke G, Kiely B, Cryan JF, Dinan TG. 2010. Effects of the probiotic  
525 *Bifidobacterium infantis* in the maternal separation model of depression. *Neuroscience* 170:1179–  
526 1188.
- 527 40. Seibenhener ML, Wooten MC. 2015. Use of the open field maze to measure locomotor and anxiety-  
528 like behavior in mice. *J Vis Exp JoVE*.
- 529 41. Ray P, Aich P. 2019. Effects of gut microbiota perturbation on Th1-and Th2-biased mice following  
530 treatment with Vancomycin. *bioRxiv* 516898.
- 531 42. Dantzer R, O'Connor JC, Freund GG, Johnson RW, Kelley KW. 2008. From inflammation to sickness  
532 and depression: when the immune system subjugates the brain. *Nat Rev Neurosci* 9:46.
- 533 43. Clarke G, Grenham S, Scully P, Fitzgerald P, Moloney RD, Shanahan F, Dinan TG, Cryan JF. 2013.  
534 The microbiome-gut-brain axis during early life regulates the hippocampal serotonergic system in a  
535 sex-dependent manner. *Mol Psychiatry* 18:666.
- 536 44. Desbonnet L, Clarke G, Shanahan F, Dinan TG, Cryan JF. 2014. Microbiota is essential for social  
537 development in the mouse. *Mol Psychiatry* 19:146.
- 538 45. Heijtz RD, Wang S, Anuar F, Qian Y, Björkholm B, Samuelsson A, Hibberd ML, Forssberg H,  
539 Pettersson S. 2011. Normal gut microbiota modulates brain development and behavior. *Proc Natl*  
540 *Acad Sci* 108:3047–3052.
- 541 46. Neufeld K-AM, Kang N, Bienenstock J, Foster JA. 2011. Effects of intestinal microbiota on anxiety-  
542 like behavior. *Commun Integr Biol* 4:492–494.
- 543 47. Suliman S, Hemmings SMJ, Seedat S. 2013. Brain-Derived Neurotrophic Factor (BDNF) protein  
544 levels in anxiety disorders: systematic review and meta-regression analysis. *Front Integr Neurosci*

- 545 7:55.
- 546 48. Saunders PR, Santos J, Hanssen NPM, Yates D, Groot JA, Perdue MH. 2002. Physical and  
547 psychological stress in rats enhances colonic epithelial permeability via peripheral CRH. *Dig Dis Sci*  
548 47:208–215.
- 549 49. Neufeld KM, Kang N, Bienenstock J, Foster JA. 2011. Reduced anxiety-like behavior and central  
550 neurochemical change in germ-free mice. *Neurogastroenterol Motil* 23:255–e119.
- 551 50. Huo R, Zeng B, Zeng L, Cheng K, Li B, Luo Y, Wang H, Zhou C, Fang L, Li W. 2017. Microbiota  
552 modulate anxiety-like behavior and endocrine abnormalities in hypothalamic-pituitary-adrenal axis.  
553 *Front Cell Infect Microbiol* 7:489.
- 554 51. Dantzer R, Konsman J-P, Bluthé R-M, Kelley KW. 2000. Neural and humoral pathways of  
555 communication from the immune system to the brain: parallel or convergent? *Auton Neurosci* 85:60–  
556 65.
- 557 52. Lee SH. 2015. Intestinal permeability regulation by tight junction: implication on inflammatory bowel  
558 diseases. *Intest Res* 13:11–18.
- 559 53. Al-Sadi R, Guo S, Ye D, Ma TY. 2013. TNF- $\alpha$  modulation of intestinal epithelial tight junction barrier  
560 is regulated by ERK1/2 activation of Elk-1. *Am J Pathol* 183:1871–1884.
- 561 54. Donaldson GP, Lee SM, Mazmanian SK. 2016. Gut biogeography of the bacterial microbiota. *Nat Rev*  
562 *Microbiol* 14:20.
- 563 55. Reikvam DH, Erofeev A, Sandvik A, Grcic V, Jahnsen FL, Gaustad P, McCoy KD, Macpherson AJ,  
564 Meza-Zepeda LA, Johansen FE. 2011. Depletion of murine intestinal microbiota: Effects on gut  
565 mucosa and epithelial gene expression. *PLoS One*.
- 566 56. Palleja A, Mikkelsen KH, Forslund SK, Kashani A, Allin KH, Nielsen T, Hansen TH, Liang S, Feng  
567 Q, Zhang C. 2018. Recovery of gut microbiota of healthy adults following antibiotic exposure. *Nat*  
568 *Microbiol* 3:1255.
- 569 57. Sudo N, Chida Y, Aiba Y, Sonoda J, Oyama N, Yu X, Kubo C, Koga Y. 2004. Postnatal microbial  
570 colonization programs the hypothalamic–pituitary–adrenal system for stress response in mice. *J*  
571 *Physiol* 558:263–275.

- 572 58. Reis DJ, Ilardi SS, Punt SEW. 2018. The anxiolytic effect of probiotics: A systematic review and  
573 meta-analysis of the clinical and preclinical literature. *PLoS One* 13:e0199041.
- 574 59. McGaughey KD, Yilmaz-Swenson T, Elsayed NM, Cruz DA, Rodriguiz RM, Kritzer MD, Peterchev  
575 A V, Roach J, Wetsel WC, Williamson DE. 2019. Relative abundance of *Akkermansia* spp. and other  
576 bacterial phylotypes correlates with anxiety-and depressive-like behavior following social defeat in  
577 mice. *Sci Rep* 9:1–11.
- 578 60. Ried K, Travica N, Sali A. 2018. The effect of Kyolic aged garlic extract on gut microbiota,  
579 inflammation, and cardiovascular markers in hypertensives: The GarGIC Trial. *Front Nutr* 5:122.
- 580 61. Ahmed F, Kerna NA, Tulp OL. Managing the F: B Ratio in DM; A Review of the Role of Firmicutes  
581 and Bacteroidetes in Diabetes Mellitus.
- 582 62. Petra AI, Panagiotidou S, Hatziagelaki E, Stewart JM, Conti P, Theoharides TC. 2015. Gut-  
583 microbiota-brain axis and its effect on neuropsychiatric disorders with suspected immune  
584 dysregulation. *Clin Ther* 37:984–995.
- 585 63. Akira S, Hemmi H. 2003. Recognition of pathogen-associated molecular patterns by TLR family.  
586 *Immunol Lett* 85:85–95.
- 587 64. Boutagy NE, McMillan RP, Frisard MI, Hulver MW. 2016. Metabolic endotoxemia with obesity: Is it  
588 real and is it relevant? *Biochimie* 124:11–20.
- 589 65. Morrison DJ, Preston T. 2016. Formation of short chain fatty acids by the gut microbiota and their  
590 impact on human metabolism. *Gut Microbes* 7:189–200.
- 591 66. Vinolo MAR, Rodrigues HG, Nachbar RT, Curi R. 2011. Regulation of inflammation by short chain  
592 fatty acids. *Nutrients* 3:858–876.

593

594

595

596

597

598 **Figure legends**

599 **Fig.1 Experimental timeline of events.** Experimental timeline from the study initiation day (day zero of  
600 vancomycin treatment) to the termination day (day 60 following the withdrawal of vancomycin treatment).

601

602 **Fig.2 Perturbation and Restoration kinetics.** Time kinetics of the major phyla (denoted by the name on  
603 top of each column of the panels) of gut microbiota following treatment with vancomycin till day 6  
604 (perturbation) and withdrawal of vancomycin post day 6 (restoration). Time-dependent percent changes in  
605 gut microbiota abundance during vancomycin perturbation and restoration, (Top Row) in the BALB/c mice  
606 A. Firmicutes phylum, B. Bacteroidetes phylum C. Proteobacteria phylum D. Verrucomicrobia phylum and  
607 (Bottom Row) in C57BL/6 mice, E. Firmicutes phylum, F. Bacteroidetes phylum G. Proteobacteria phylum  
608 H. Verrucomicrobia phylum.

609 The lower X-axis represents perturbation days, and the upper X-axis represents restoration days while-axis  
610 represents percentage abundance of gut microbiota. VB denotes vancomycin treated BALB/c and VC  
611 denotes vancomycin treated C57BL/6. Statistical significance changes were calculated by comparing values  
612 of the treated groups at various time points with their respective untreated groups using either two-way  
613 ANOVA or t-test, as described in preceding sections. ‘a’ showed Comparison between zero day and fourth  
614 day of perturbation; ‘b’ showed comparison between zero day and 6<sup>th</sup> day of perturbation; ‘c’ showed  
615 comparison between zero day and 15<sup>th</sup> day of restoration. a1, and c1 corresponds to  $P \leq 0.05$ ; c2 corresponds  
616 to  $P \leq 0.01$ ; a3, b3, c3 corresponds to  $P \leq 0.001$ ; a4, b4 corresponds to  $P \leq 0.0001$ . Error bars shown are a  
617 standard deviation from the mean value of three replicates.

618

619 **Fig.3** Pie chart showing the comparative changes in major phyla of gut microbiota at important time points  
620 of the experiment: Zero day (untreated mice), fourth and sixth day of vancomycin perturbation, 15th and 60th  
621 day of restoration in both BALB/c and C57BL/6 mice.

622 Abundance of major phyla of gut microbes (Top Row) in BALB/c mice on day A. 0 (untreated control)(CB),  
623 B. 4(VB4), C. 6(VB6) following treatment with vancomycin, or D. 15(VBR15), and E. 60(VBR60) following  
624 withdrawal of vancomycin treatment, (Bottom Row) in C57BL/6 mice on day F. 0 (CC), G. 4(VC4), and H.  
625 6(VC6) following treatment with vancomycin, or I. 15 (VCR15), and J. 60 (VCR60) following withdrawal of  
626 vancomycin treatment. Color codes of each phylum are shown at the bottom of the figure.



627

628 **Fig.4I** Detection of anxiety level in BALB/c and C57BL/6 mice through Elevated Plus Maze (EPM) test,  
629 open-field (OFT) and free-swimming test (FST). Elevated plus-maze data showing time spent in the closed  
630 arms (in minutes) for vancomycin treated A. BALB/c (VB) and untreated control mice (CB), or B. C57BL/6  
631 (VC) and untreated control mice (CC) during various time points of gut microbiota perturbation (following  
632 treatment with vancomycin) and restoration (withdrawal of vancomycin treatment).

633 Open Field Test data showing time spent in the center (in minutes) for vancomycin-treated C. BALB/c (VB)  
634 and untreated control mice (CB), or D. C57BL/6 (VC) and untreated control mice (CC) during various time  
635 points of gut microbiota perturbation and restoration.

636 Forced swimming test data showing Immobility time spent (in minutes) for vancomycin-treated E. BALB/c  
637 (VB) and untreated control mice (CB), or F. C57BL/6 (VC) and untreated control mice (CC) during various  
638 time points of gut microbiota perturbation and restoration.

639 (Statistical significance changes were calculated by comparing values of the treated groups at various time  
640 points with their respective untreated groups through two-way ANOVA and t-test. ‘a’ showed Comparison  
641 between zero day and fourth day of perturbation; ‘b’ showed comparison between zero day and 6<sup>th</sup> day of  
642 perturbation; ‘c’ showed comparison between zero day and 15<sup>th</sup> day of restoration.)

643 c1 corresponds to  $P \leq 0.05$ ; b2,c2 corresponds to  $P \leq 0.01$ ; b3 corresponds to  $P \leq 0.001$ ; a4,c4 corresponds to  
644  $P \leq 0.0001$ . Error bars shown are a standard deviation from the mean value of seven replicates (n=7).

645

646 **Fig.4II Locomotor activities by the Elevated Plus Maze test.** Image depicts the trajectory or the paths that  
647 the mice traversed to represent the locomotor activities at different location of the Elevated plus maze  
648 instrument during vancomycin treatment and restoration phase of both BALB/c and C57BL/6 mice. Tracking  
649 areas are measured by Smart 3.0, Panlab SMART video tracking system, Harvard Apparatus.

650 Untreated control BALB/c (CB) and C57BL/6 mice (CC); day 2, 4, and 6 days following vancomycin  
651 treatment in BALB/c mice (VB2, VB4, VB6), and C57BL/6 (VC2, VC4, VC6); day 15, 30, 45, 60 days  
652 following withdrawal of vancomycin treatment in BALB/c (VBR15, VBR30, VBR45, VBR60) and C57BL/6  
653 (VCR15, VCR30, VCR45, VCR60).

654

655 **Fig. 4III Locomotor activities by the Open Field Test.** Image depicts the trajectory or the paths that the  
656 mice traversed to represent the locomotor activities at different locations of the open field instrument during  
657 vancomycin treatment and restoration phase of both BALB/c and C57BL/6 mice. Images were taken and  
658 tracking areas are measured by Smart 3.0, Panlab SMART video tracking system, Harvard Apparatus.  
659 Untreated control BALB/c (CB) and C57BL/6 mice(CC); day 2, 4, and 6 days following vancomycin  
660 treatment in BALB/c mice (VB2, VB4, VB6), and C57BL/6 (VC2, VC4, VC6); day 15, 30, 45, 60 days  
661 following withdrawal of vancomycin treatment in BALB/c (VBR15, VBR30, VBR45, VBR60) and C57BL/6  
662 (VCR15, VCR30, VCR45, VCR60).

663  
664 **Fig.5** Transcriptional profile of different genes in the brain of mice. Kinetics of expression (by qRT-PCR) of  
665 various stress-related and inflammatory genes in the brain of the mice during vancomycin perturbation and  
666 restoration period. BDNF, CRH, CRHBP gene expression at mRNA level in A. BALB/c (VB) and B.  
667 C57BL/6 (VC) mice. Immune (tnf $\alpha$ , il1a) and tight junction genes (claudin5) expression at mRNA level in  
668 the brain of C. BALB/c (VB) and D. C57BL/6 (VC) mice.

669 (Statistical significance changes were calculated by comparing values of the treated groups at various time  
670 points with their respective untreated groups through two-way ANOVA and t-test. ‘a’ showed Comparison  
671 between zero day and fourth day of perturbation; ‘b’ showed comparison between zero day and 6<sup>th</sup> day of  
672 perturbation; ‘c’ showed comparison between zero day and 15<sup>th</sup> day of restoration.)

673 a1, b1 and c1 corresponds to  $P \leq 0.05$ ; a2,b2 corresponds to  $P \leq 0.01$ ; a3,b3 corresponds to  $P \leq 0.001$ ; a4,b4  
674 corresponds to  $P \leq 0.0001$ . Error bars shown are a standard deviation from the mean value of six replicates.

675 **Fig.6** Transcriptional profile (by qRT-PCR) of various immune genes and tight junction genes in the gut  
676 tissue of mice during vancomycin perturbation and restoration period.

677 Kinetics of expression of various immune genes at mRNA level in the colon of vancomycin treated BALB/c  
678 (VB) and C57BL/6 (VC) mice, A. tnf $\alpha$ , B. il1a C. il10, and tight junction genes D. occludin and E.  
679 Claudin1.F. FITC dextran concentration in serum at various time points of perturbation and restoration  
680 period. G. Representative images of various sizes of cecum from both BALB/c and C57BL/6 mice. (Cecum  
681 of day 6 following vancomycin treatment in BALB/c (VB6) and C57BL/6 (VC6), day 60 following the  
682 withdrawal of vancomycin treatment in BALB/c (VBR60) and C57BL/6 (VCR60), untreated control mice  
683 C57BL/6 (CC) and BALB/c (CB)) H. kinetics of the cecal index during gut microbiota perturbation and  
684 restoration period.

685 (Statistical significance changes were calculated by comparing values of the treated groups at various time  
686 points with their respective untreated groups through two-way ANOVA and t-test. ‘a’ showed Comparison  
687 between zero day and fourth day of perturbation; ‘b’ showed comparison between zero day and 6<sup>th</sup> day of  
688 perturbation; ‘c’ showed comparison between zero day and 15<sup>th</sup> day of restoration.)

689 b1 and c1 corresponds to  $P \leq 0.05$ ; a2,b2,c2,d2 corresponds to  $P \leq 0.01$ ; a3,b3 corresponds to  $P \leq 0.001$ ; a4,b4  
690 corresponds to  $P \leq 0.0001$ . Error bars shown are a standard deviation from the mean value of six replicates.

## 691 **Tables**

692

693 **Table1:** Total bacterial Operational Taxonomic Unit (OTU) abundance, as determined using metataxonomic  
694 studies by 16S rRNA analysis shown.

695

696

|              | <b>Total OTU</b><br>( $\pm$ SD) | <b>Firmicutes</b><br>( $\pm$ SD) | <b>Bacteroidetes</b><br>( $\pm$ SD) | <b>Gammaproteobacteria</b><br>( $\pm$ SD) |
|--------------|---------------------------------|----------------------------------|-------------------------------------|-------------------------------------------|
| <b>CB</b>    | 1202302 $\pm$ 121784            | 913749 $\pm$ 117270              | 411110 $\pm$ 30549                  | 21669 $\pm$ 3330                          |
| <b>VB6</b>   | 348767 $\pm$ 47413              | 82167 $\pm$ 5213                 | 39 $\pm$ 8                          | 243419 $\pm$ 74791                        |
| <b>VBR60</b> | 828761 $\pm$ 52511              | 364682 $\pm$ 36412               | 135639 $\pm$ 12132                  | 20858 $\pm$ 1324                          |
| <b>CC</b>    | 1661713 $\pm$ 17456             | 1267787 $\pm$ 486676             | 482535 $\pm$ 25295                  | 14075 $\pm$ 4065                          |
| <b>VC6</b>   | 330339 $\pm$ 20317              | 30970 $\pm$ 3211                 | 13 $\pm$ 6                          | 233940 $\pm$ 42841                        |
| <b>VCR60</b> | 792260 $\pm$ 43765              | 441953 $\pm$ 54632               | 92280 $\pm$ 4542                    | 36265 $\pm$ 5213                          |

697

698 Total bacterial OTU number, and some major groups of bacterial OTU number present in the cecal content of  
699 mice determined by metagenomic analysis (16S rRNA) in different conditions (vancomycin treated groups of  
700 mice (VB6, VC6) along with the time matched control mice (CB6, CC6) in BALB/c and C57BL/6 mice.  
701 VBR60, VCR60 correspond to 60<sup>th</sup> day restored mice following cessation of vancomycin treatment).

702

703 **Table 2:** Shannon diversity index (H) of BALB/c and C57BL/6 mice at phylum level. Diversity index was  
704 calculated at major time points of the perturbation and restoration period of gut microbiota.

---

| <b>Perturbation Days</b> | <b>H of BALB/c</b> | <b>H of C57BL/6</b> |
|--------------------------|--------------------|---------------------|
| 0                        | 0.97±0.05          | 0.8±0.02            |
| 4                        | 0.37±0.04          | 0.4±0.07            |
| 6                        | 0.9±0.09           | 0.78±0.03           |
| <b>Restoration Days</b>  |                    |                     |
| 15                       | 1.1±0.08           | 0.9±0.07            |
| 30                       | 0.9±0.05           | 0.8±0.02            |
| 60                       | 0.8±0.06           | 0.8±0.04            |

---

705  
706 **Table 3:** Comparison of Firmicutes to Bacteroidetes ratio (F/B) at different time points of BALB/c and  
707 C57BL/6 mice.

---

| <b>Perturbation Days</b> | <b>F/B ratio of BALB/c</b> | <b>F/B ratio of C57BL/6</b> |
|--------------------------|----------------------------|-----------------------------|
| 0                        | 2.12±0.23                  | 2.73±0.44                   |
| 2                        | 1628±101                   | 20717±912                   |
| 3                        | 9773.5±628                 | 1134.06±121                 |
| 4                        | 5002.8±700                 | 5754.77±506                 |
| 5                        | 3099.15±9.8                | 1630.37±33                  |

---

6 2106.38±2810 580.63±78

**Restoration Days**

15 1.63±0.78 2.32±0.67

30 2.17±0.19 4.92±1.2

60 2.68±0.41 4.78± 0.81

708

709 **Table 4:** Sequences of forward (\_F) and reverse (\_R) primers for PCR studies to confirm presence and  
710 expression level of various genes used in this study.

| <b>Gene specific for</b> | <b>Sequences of the primers used</b> |
|--------------------------|--------------------------------------|
| <i>tnfa_F</i>            | 5'-CCACGTCGTAGCAAACCACCAAAG-3'       |
| <i>tnfa_R</i>            | 5'- TGCCCGGACTCCGCAAAGTCTAAG-3'      |
| <i>il10_F</i>            | 5'-AGGCAGTGGAGCAGGTGAAGAGTG-3'       |
| <i>il10_R</i>            | 5'-GCTCTCAAGTGTGGCCAGCCTTAG-3'       |
| <i>illa_F</i>            | 5'-ATCAGTACCTCACGGCTGCT-3'           |
| <i>illa_R</i>            | 5'-TGGGTATCTCAGGCATCTCC-3'           |
| <i>cldn1_F</i>           | 5'-TGCCCCAGTGGAAGATTTACT-3'          |
| <i>cldn1_R</i>           | 5'-CTTTGCGAAACGCAGGACAT-3'           |
| <i>ocln_F</i>            | 5'- GTTGAACGTGGATTGGCAG -3'          |
| <i>ocln_R</i>            | 5'- AAGATAAGCGAACCTTGGCG -3'         |

|                |                                                |
|----------------|------------------------------------------------|
| <i>cldn5_F</i> | 5'- TTA AGG CAC GGG TAG CAC TCA CG -3'         |
| <i>cldn5_R</i> | 5'-TTA GAC ATA GTT CTT CTT GTC GTA<br>ATC G-3' |
| <i>BDNF_F</i>  | 5'-TCATACTTCGGTTGCATGAAGG-3'                   |
| <i>BDNF_R</i>  | 5'-ACACCTGGGTAGGCCAAGTT-3'                     |
| <i>CRH_F</i>   | 5'-ACCAAGGGAGGAGAAGAGAG-3'                     |
| <i>CRH_R</i>   | 5'-TGCAAGAAATTCAAGGGCTG-3'                     |
| <i>CRHBP_F</i> | 5'-AAGGGGAGAGAGCCGCTA-3'                       |
| <i>CRHBP_R</i> | 5'-TTTCCATTTGCTGCCCAT-3'                       |

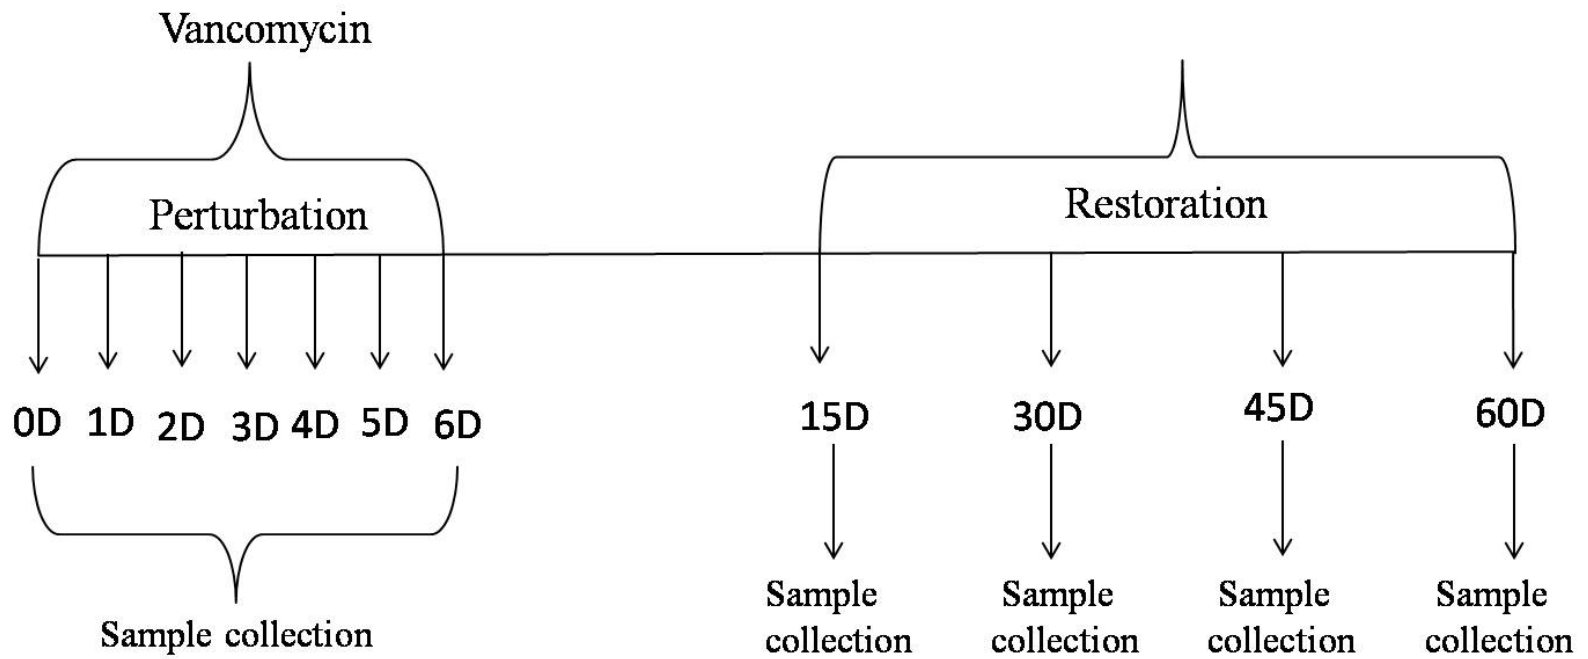



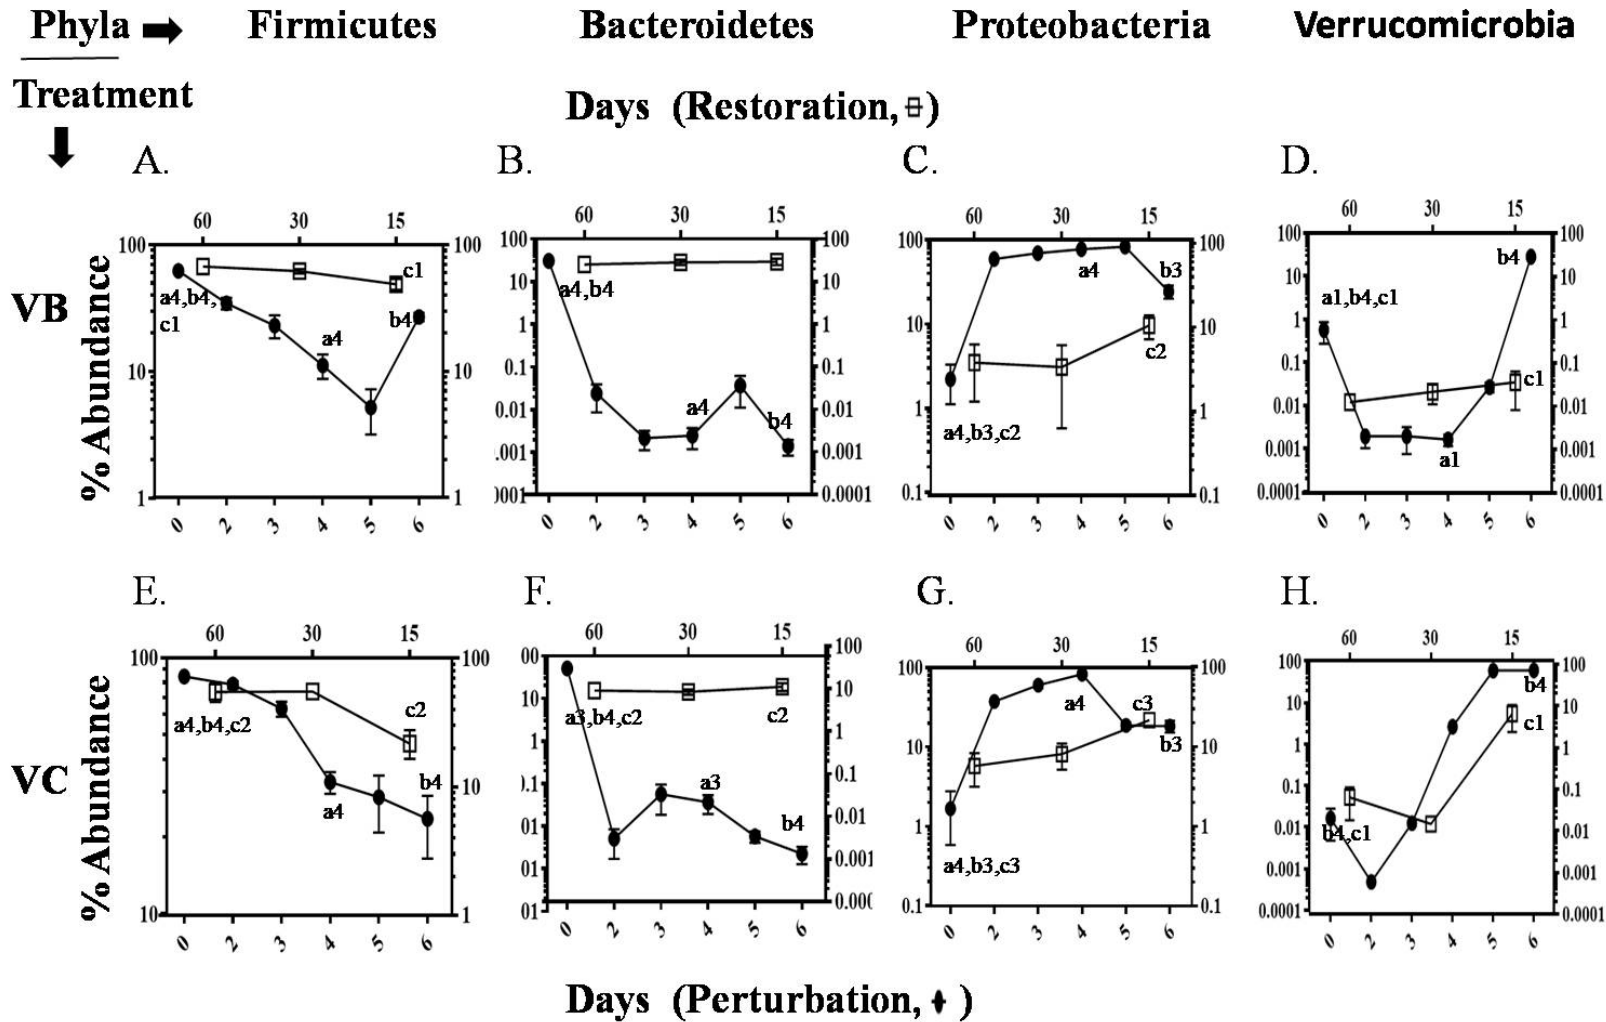

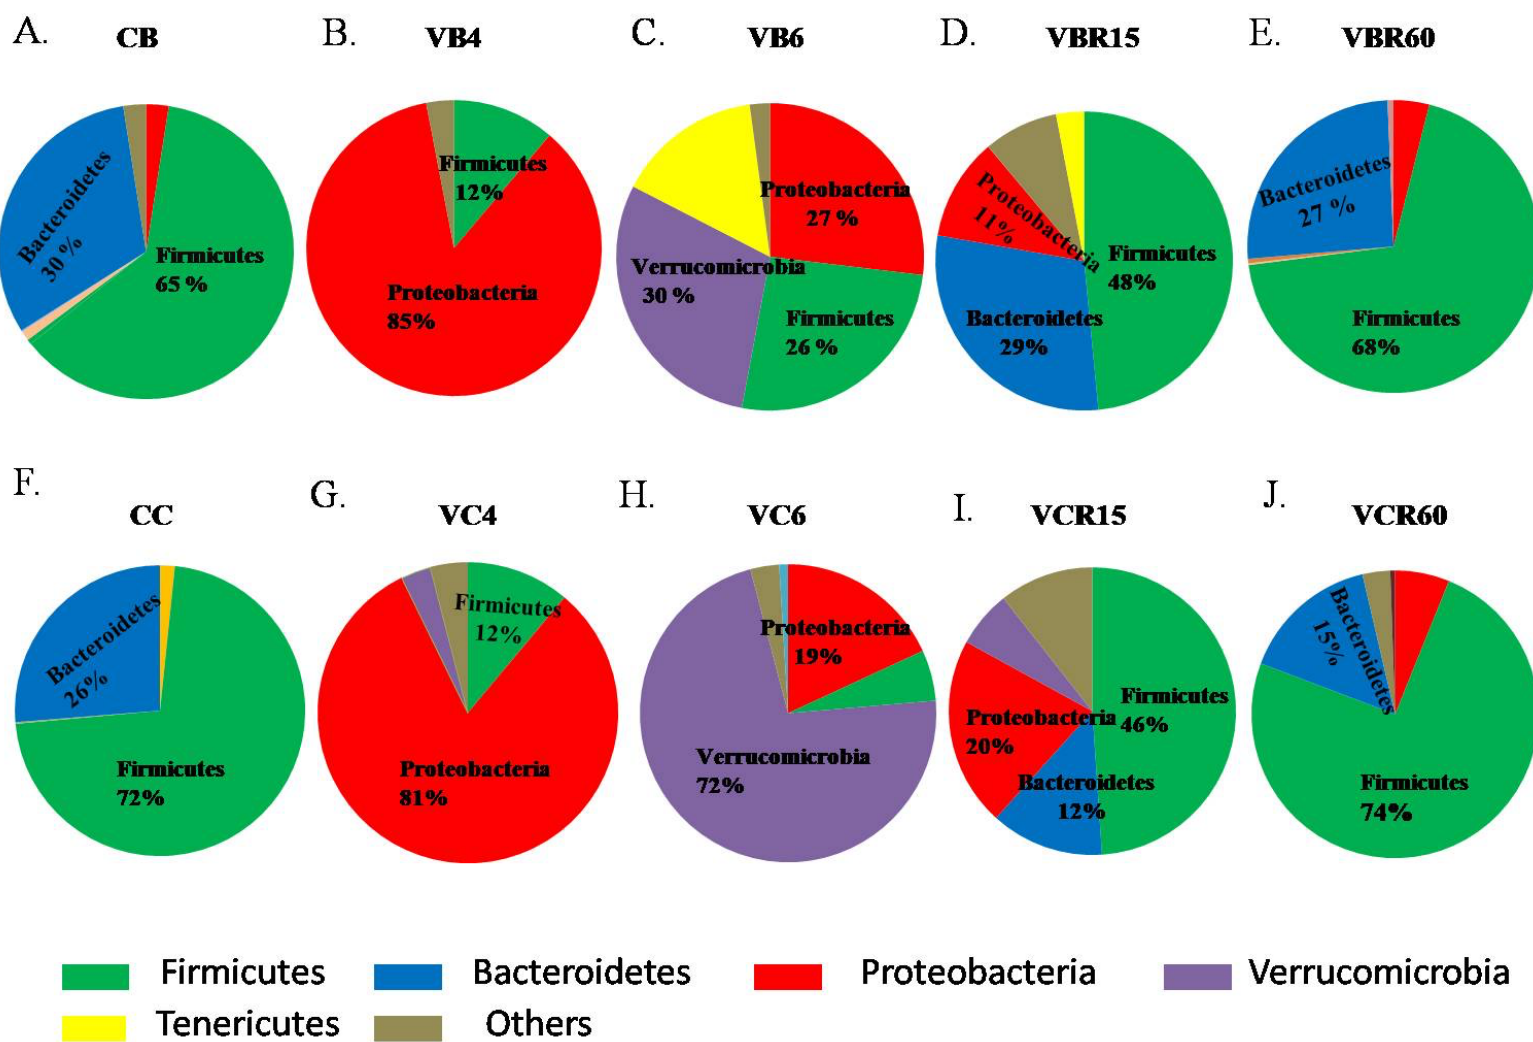

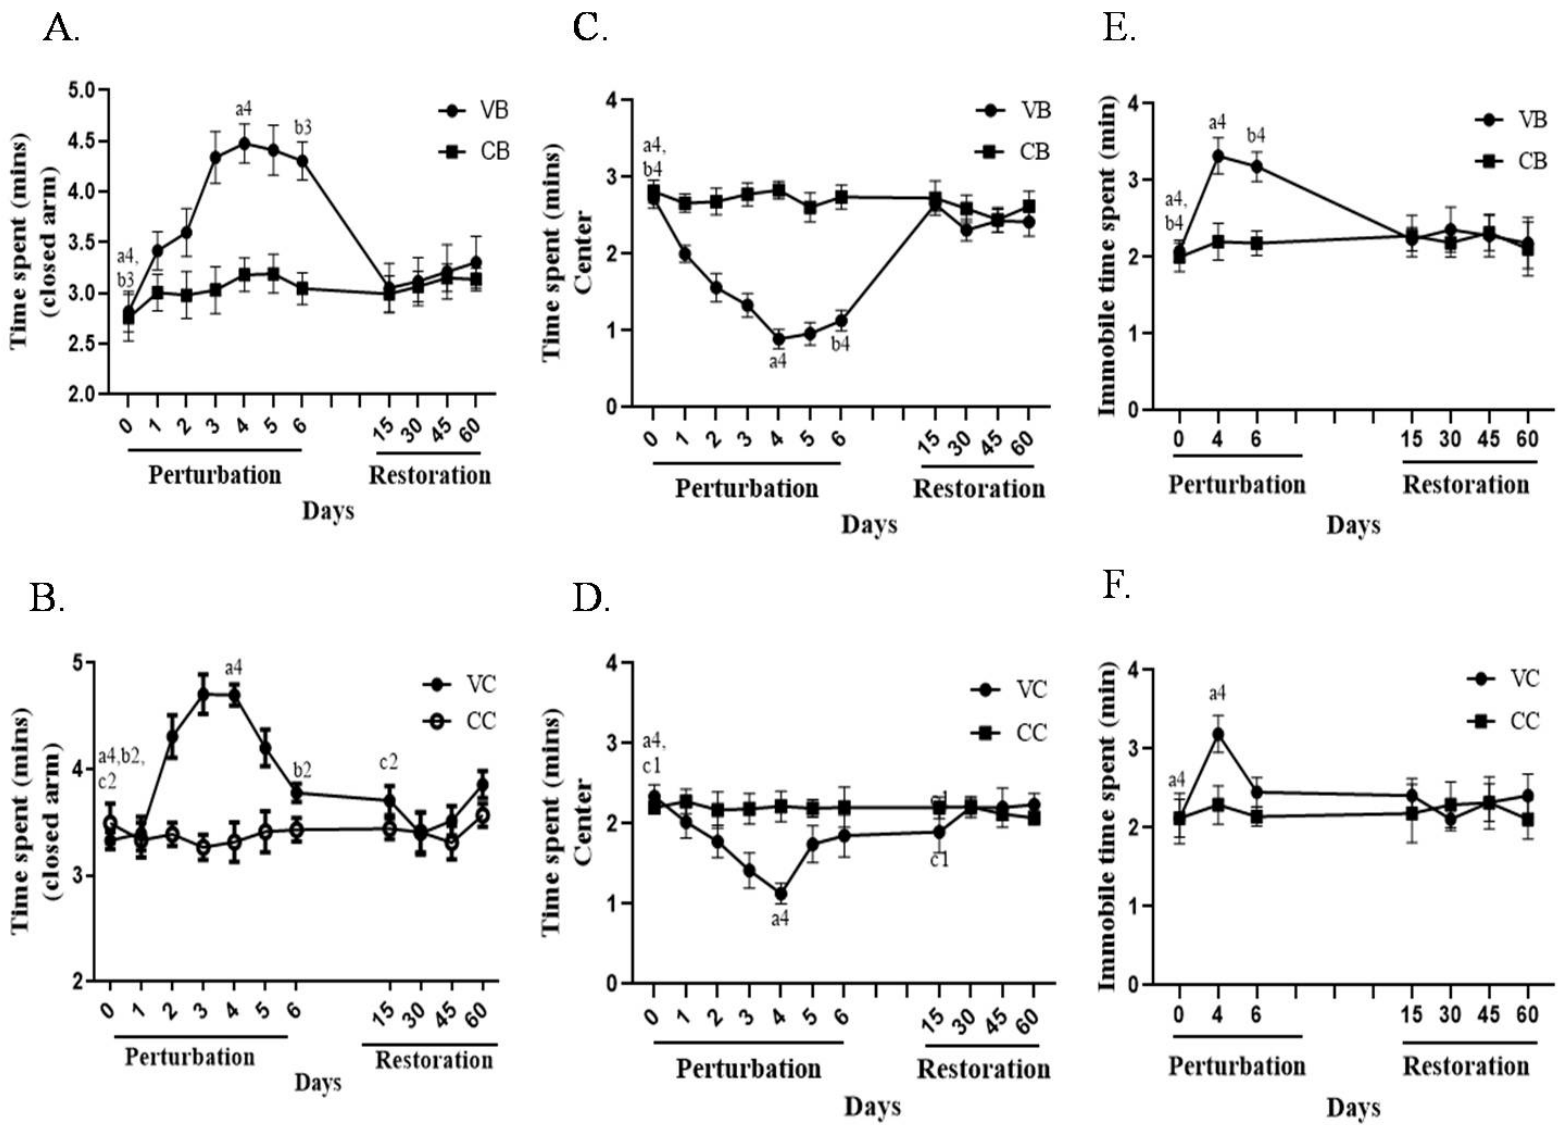

**CB**

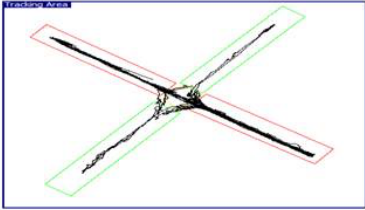

**VB2**

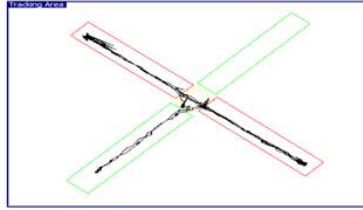

**VB4**

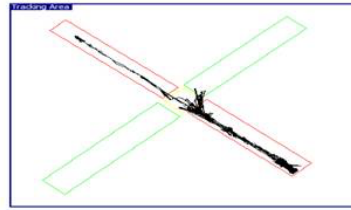

**VB6**

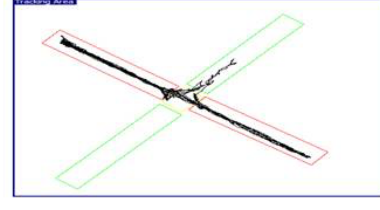

**VBR15**

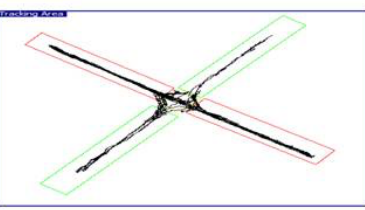

**VBR30**

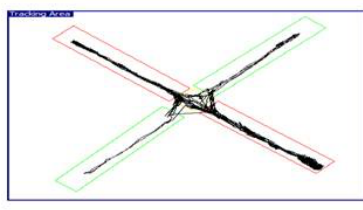

**VBR60**

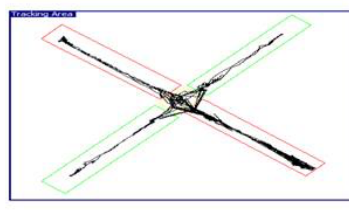

**CC**

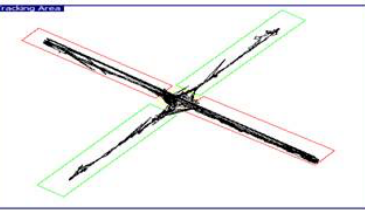

**VC2**

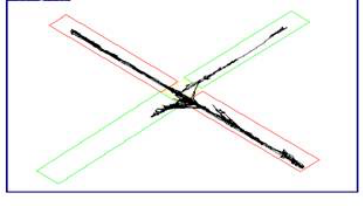

**VC4**

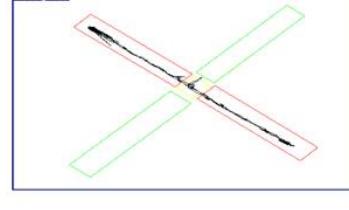

**VC6**

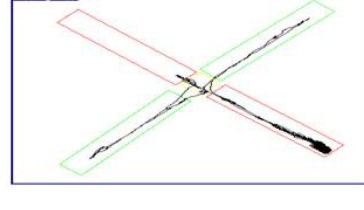

**VCR15**

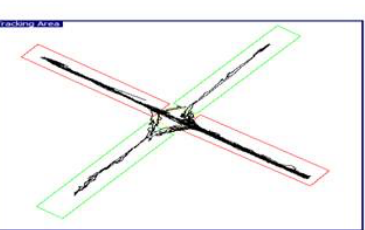

**VCR30**

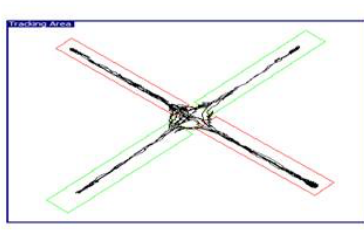

**VCR60**

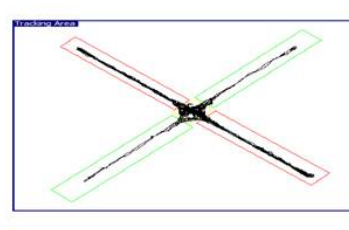

**CB**

**VB2**

**VB4**

**VB6**

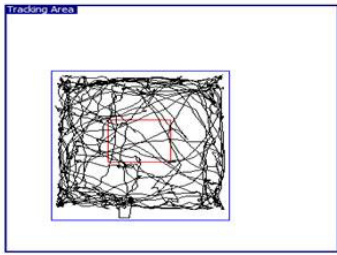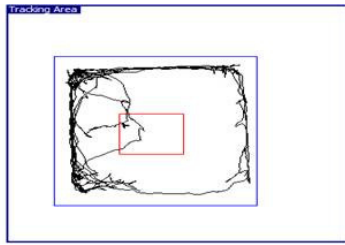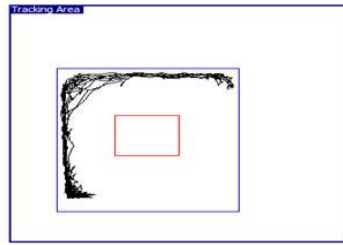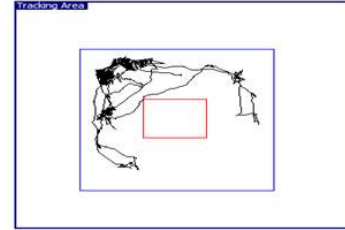

**VBR15**

**VBR30**

**VBR45**

**VBR60**

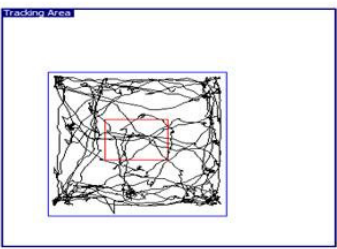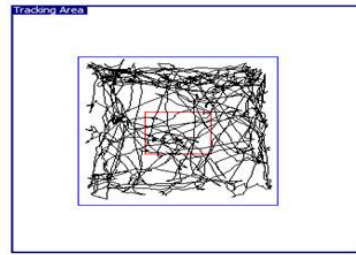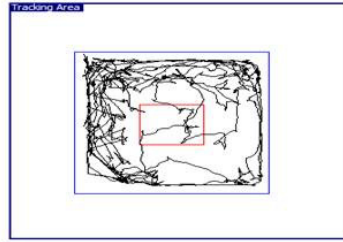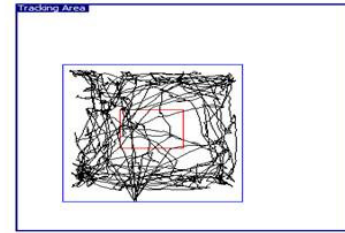

**CC**

**VC2**

**VC4**

**VC6**

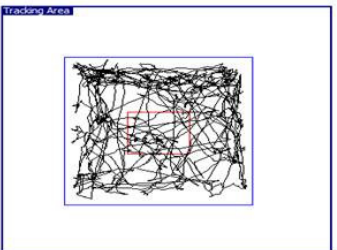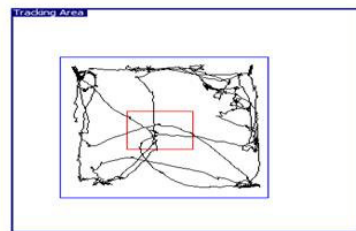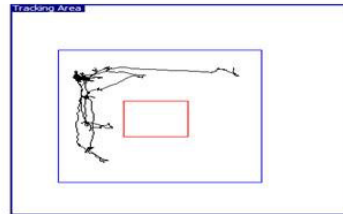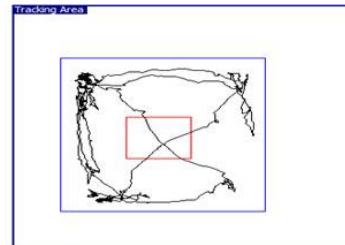

**VCR15**

**VCR30**

**VCR45**

**VCR60**

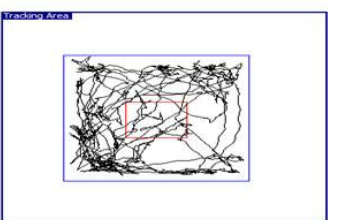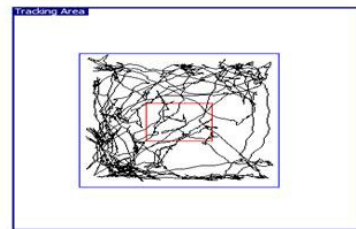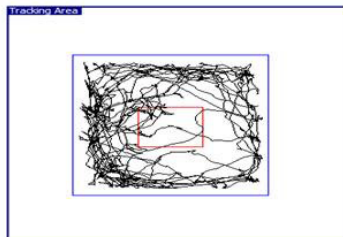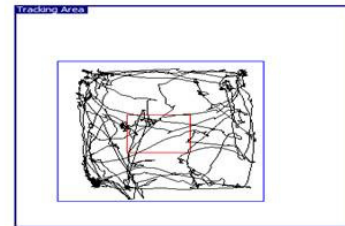



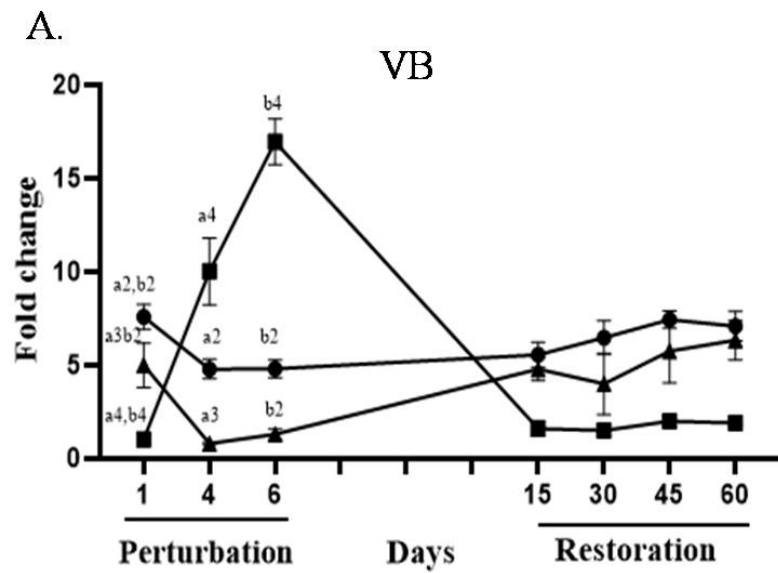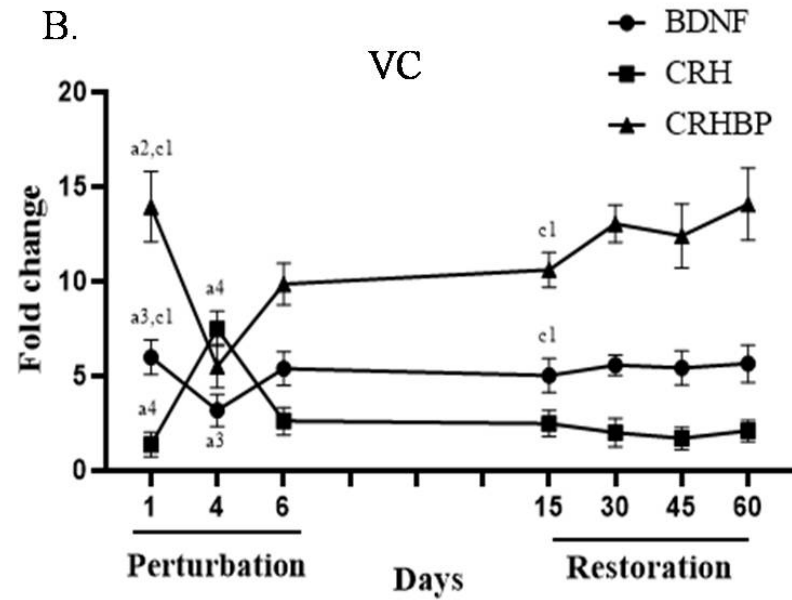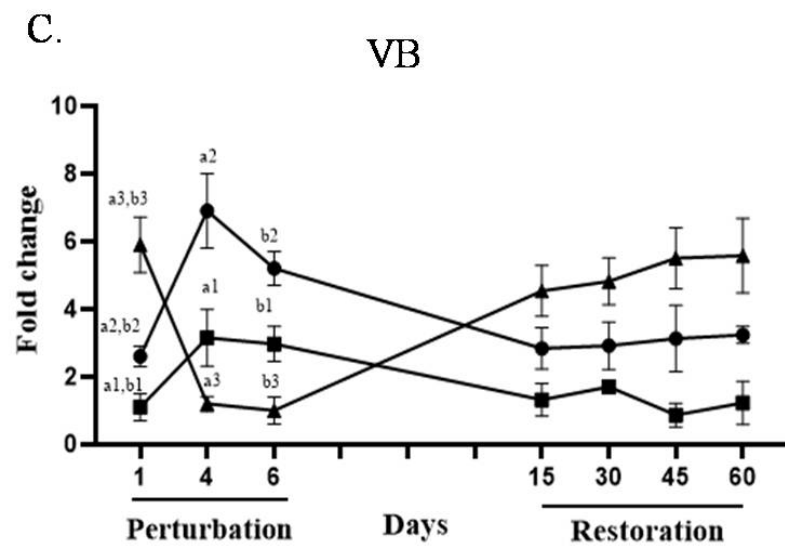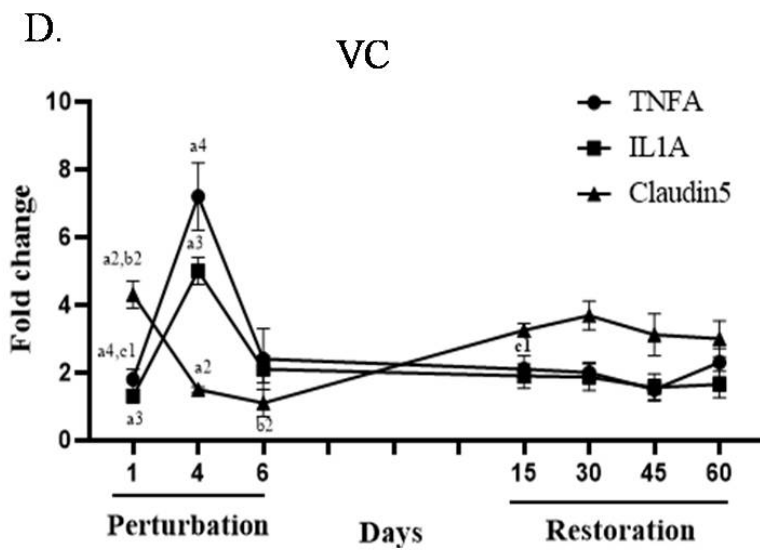

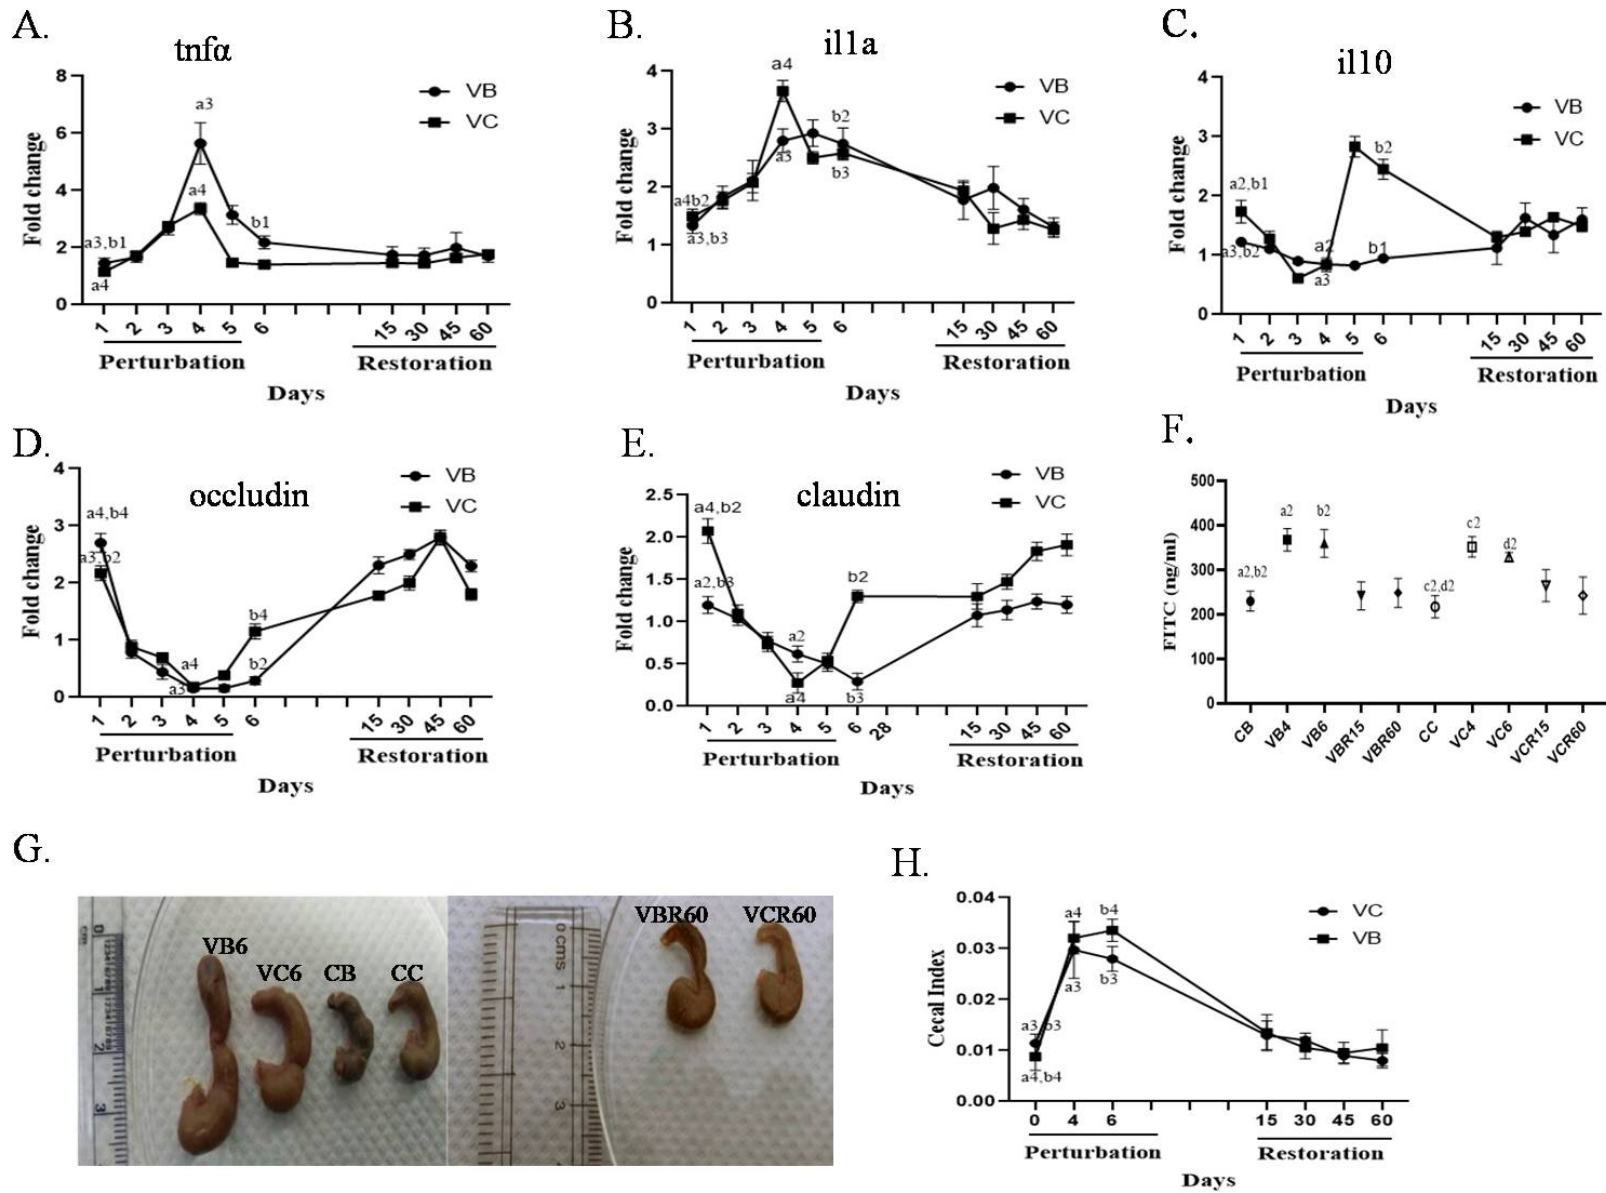

Source: https://www.biorxiv.org/content/10.1101/2020.05.07.083659v1.full.pdf
